# Supplementary material for: Old trees are perceived as a valuable element of the municipal forest landscape
Source: PeerJ. 2022 Jan 12;10:e12700. doi: 10.7717/peerj.12700 (PMC8760855; doi:10.7717/peerj.12700)
Supplement: Supplemental Information 1 [file peerj-10-12700-s001.xlsx]

## Sheet: Sheet1
Tests Kaisera-Mayera-Olkina & Bartletta
KMO measure of the adequacy of the sample selection		0.797028
Bartlett sphericity test	Approximate chi-square	824.298
	df	55
	Relevance	1.03365e-137
Common volatility resources
	Initial	After extracting
1. Old trees trees in the municipal forest pose a potential threat to the safety of visitors.	1	0.581636
2. Old trees are more valuable to the environment than younger trees.	1	0.568104
3. It is better to replace an old tree with a younger one.	1	0.531777
4. Fruiting bodies of fungi on the trunk or branches do not mean a death sentence for the tree on which they grow.	1	0.248619
5. Hollow trees pose a greater threat than trees without hollows.	1	0.446275
6. Decayed trees inside must be cut down immediately.	1	0.57217
7. Old trees increase the attractiveness of municipal forests.	1	0.445224
8. Dying trees should be cut down even if they are natural monuments.	1	0.427014
9. Trees in municipal forests should undergo the same care as street trees.	1	0.660888
10. Cutting branches improves the health of even old trees.	1	0.673993
11. There are many methods to determine the actual health of very old trees.	1	0.374709
Method of extracting factors - main components.
Total variance explained
Component	Initial eigenvalues			Sums of squared charges after isolation			Sums of squared charges after rotation
	Overall	% variance	% cumulative	Overall	% variance	% cumulative	Overall	% variance	% cumulative
1	3.19436	29.0397	29.0397	3.19436	29.0397	29.0397	2.429	22.0818	22.0818
2	1.24633	11.3303	40.37	1.24633	11.3303	40.37	1.58575	14.4159	36.4977
3	1.08971	9.90647	50.2764	1.08971	9.90647	50.2764	1.51566	13.7787	50.2764
4	0.995915	9.05377	59.3302
5	0.877583	7.97803	67.3082
6	0.805745	7.32495	74.6332
7	0.705109	6.41009	81.0433
8	0.606231	5.51119	86.5545
9	0.535542	4.86857	91.423
10	0.495799	4.50726	95.9303
11	0.447667	4.0697	100
Method of extracting factors - main components.
Component matrixa
	Component
	1	2	3
1. Old trees trees in the municipal forest pose a potential threat to the safety of visitors.	0.677854	-0.0189586	0.348985
2. Old trees are more valuable to the environment than younger trees.	-0.554302	0.445959	0.248944
3. It is better to replace an old tree with a younger one.	0.671546	-0.156927	0.237018
4. Fruiting bodies of fungi on the trunk or branches do not mean a death sentence for the tree on which they grow.	-0.332567	0.228836	0.292665
5. Hollow trees pose a greater threat than trees without hollows.	0.402187	0.135073	0.516019
6. Decayed trees inside must be cut down immediately.	0.730337	0.161914	0.112075
7. Old trees increase the attractiveness of municipal forests.	-0.487539	0.451309	0.062043
8. Dying trees should be cut down even if they are natural monuments.	0.613798	0.183061	0.12944
9. Trees in municipal forests should undergo the same care as street trees.	0.485853	0.435111	-0.485297
10. Cutting branches improves the health of even old trees.	0.549022	0.439718	-0.42334
11. There are many methods to determine the actual health of very old trees.	-0.13778	0.552971	0.223492
Method of extracting factors - main components.
a. 3 – number of extracted components. number of extracted components.
Matrix of rotated componentsa
	Component
	1	2	3
1. Old trees trees in the municipal forest pose a potential threat to the safety of visitors.	0.744918	-0.159729	0.0349233
2. Old trees are more valuable to the environment than younger trees.	-0.242539	0.700931	-0.134071
3. It is better to replace an old tree with a younger one.	0.657524	-0.314291	0.025712
4. Fruiting bodies of fungi on the trunk or branches do not mean a death sentence for the tree on which they grow.	-0.0650882	0.451508	-0.201304
5. Hollow trees pose a greater threat than trees without hollows.	0.642052	0.153835	-0.101877
6. Decayed trees inside must be cut down immediately.	0.66735	-0.141293	0.32688
7. Old trees increase the attractiveness of municipal forests.	-0.299462	0.595777	0.0244232
8. Dying trees should be cut down even if they are natural monuments.	0.587203	-0.0664174	0.278918
9. Trees in municipal forests should undergo the same care as street trees.	0.150175	-0.075642	0.79537
10. Cutting branches improves the health of even old trees.	0.237777	-0.0728294	0.782401
11. There are many methods to determine the actual health of very old trees.	0.086801	0.593533	0.122036
Method of extracting factors - main components. Rotation method - Quartimax with Kaiser normalization.
a. Rotation converged in 5 iterations.
Matrix of transformed components
Component	1	2	3
1	0.797084	-0.434855	0.418997
2	0.116064	0.79124	0.60039
3	0.59261	0.429931	-0.681156
Method of extracting factors - main components. Metoda rotacji - Quartimax z normalizacją Kaisera.
