# Supplementary material for: Old trees are perceived as a valuable element of the municipal forest landscape
Source: PeerJ. 2022 Jan 12;10:e12700. doi: 10.7717/peerj.12700 (PMC8760855; doi:10.7717/peerj.12700)
Supplement: Supplemental Information 2 [file peerj-10-12700-s002.xlsx]

## Sheet: Sheet1
		Overall		Sex						Age										Place of residence										Education										How often do you visit municiapl forest?
		Overall		Female		Male		Other		18-25		26-35		36-45		46-55		56+		Village		Town with less than 25 000 residents		Town 25 000 -100 000 residents		City with 101 000 - 500 000 residents		City with over 500 000 residents		Elemetary		Vocational		Secondary		Students		Higher		Once a week or more often		Once per several weeks/ once a month		Several times a year
		Number	% of N in the column	Number	% of N in the column	Number	% of N in the column	Number	% of N in the column	Number	% of N in the column	Number	% of N in the column	Number	% of N in the column	Number	% of N in the column	Number	% of N in the column	Number	% of N in the column	Number	% of N in the column	Number	% of N in the column	Number	% of N in the column	Number	% of N in the column	Number	% of N in the column	Number	% of N in the column	Number	% of N in the column	Number	% of N in the column	Number	% of N in the column	Number	% of N in the column	Number	% of N in the column	Number	% of N in the column
Sex	Female	341	0.67126	341	1	0	0	0	0	69	0.610619	104	0.753623	80	0.615385	44	0.571429	44	0.88	47	0.594937	11	0.578947	14	0.56	12	0.75	257	0.696477	6	0.5	3	0.6	39	0.619048	33	0.55	260	0.706522	70	0.636364	103	0.677632	168	0.682927
	Male	146	0.287402	0	0	146	1	0	0	31	0.274336	32	0.231884	46	0.353846	32	0.415584	5	0.1	29	0.367089	7	0.368421	10	0.4	4	0.25	96	0.260163	6	0.5	2	0.4	22	0.349206	18	0.3	98	0.266304	38	0.345455	39	0.256579	69	0.280488
	Other	21	0.0413386	0	0	0	0	21	1	13	0.115044	2	0.0144928	4	0.0307692	1	0.012987	1	0.02	3	0.0379747	1	0.0526316	1	0.04	0	0	16	0.0433604	0	0	0	0	2	0.031746	9	0.15	10	0.0271739	2	0.0181818	10	0.0657895	9	0.0365854
	Overall	508	1	341	1	146	1	21	1	113	1	138	1	130	1	77	1	50	1	79	1	19	1	25	1	16	1	369	1	12	1	5	1	63	1	60	1	368	1	110	1	152	1	246	1
Comparing proportions in columnsb
		Overall	Sex			Age					Place of residence					Education					How often do you visit municiapl forest?
		Overall	Female	Male	Other	18-25	26-35	36-45	46-55	56+	Village	Town with less than 25 000 residents	Town 25 000 -100 000 residents	City with 101 000 - 500 000 residents	City with over 500 000 residents	Elementary	Vocational	Secondary	Students	Higher	Once a week or more often	Once per several weeks/ once a month	Several times a year
		(A)	(A)	(B)	(C)	(A)	(B)	(C)	(D)	(E)	(A)	(B)	(C)	(D)	(E)	(A)	(B)	(C)	(D)	(E)	(A)	(B)	(C)
Sex	Female	.	.a	.a	.a					A C D
	Male	.	.a	.a	.a			E	B E
	Other	.	.a	.a	.a	B								.a		.a	.a		E
Results are based on two-tailed tests with a significance level of 0.05. For each significant pair, the category with the smaller column proportion appears below the category with the greater proportion in the columns.
a. This category was not used in the comparisons because its column ratio is zero or one. b. Tests are adjusted for all pairwise comparisons within each inner subtable using the Bonferroni correction.
		Overall		Sex						Age										Place of residence										Education										How often do you visit municiapl forest?
		Overall		Female		Male		Other		18-25		26-35		36-45		46-55		56+		Village		Town with less than 25 000 residents		Town 25 000 -100 000 residents		City with 101 000 - 500 000 residents		City with over 500 000 residents		Elemetary		Vocational		Secondary		Students		Higher		Once a week or more often		Once per several weeks/ once a month		Several times a year
		Number	% of N in the column	Number	% of N in the column	Number	% of N in the column	Number	% of N in the column	Number	% of N in the column	Number	% of N in the column	Number	% of N in the column	Number	% of N in the column	Number	% of N in the column	Number	% of N in the column	Number	% of N in the column	Number	% of N in the column	Number	% of N in the column	Number	% of N in the column	Number	% of N in the column	Number	% of N in the column	Number	% of N in the column	Number	% of N in the column	Number	% of N in the column	Number	% of N in the column	Number	% of N in the column	Number	% of N in the column
Age	18-25	113	0.222441	69	0.202346	31	0.212329	13	0.619048	113	1	0	0	0	0	0	0	0	0	29	0.367089	3	0.157895	7	0.28	3	0.1875	71	0.192412	9	0.75	1	0.2	20	0.31746	50	0.833333	33	0.0896739	17	0.154545	34	0.223684	62	0.252033
	26-35	138	0.271654	104	0.304985	32	0.219178	2	0.0952381	0	0	138	1	0	0	0	0	0	0	16	0.202532	2	0.105263	4	0.16	7	0.4375	109	0.295393	0	0	0	0	12	0.190476	7	0.116667	119	0.32337	29	0.263636	56	0.368421	53	0.215447
	36-45	130	0.255906	80	0.234604	46	0.315068	4	0.190476	0	0	0	0	130	1	0	0	0	0	14	0.177215	5	0.263158	11	0.44	3	0.1875	97	0.262873	0	0	1	0.2	14	0.222222	1	0.0166667	114	0.309783	35	0.318182	34	0.223684	61	0.247967
	46-55	77	0.151575	44	0.129032	32	0.219178	1	0.047619	0	0	0	0	0	0	77	1	0	0	16	0.202532	5	0.263158	3	0.12	2	0.125	51	0.138211	0	0	3	0.6	7	0.111111	1	0.0166667	66	0.179348	18	0.163636	14	0.0921053	45	0.182927
	56+	50	0.0984252	44	0.129032	5	0.0342466	1	0.047619	0	0	0	0	0	0	0	0	50	1	4	0.0506329	4	0.210526	0	0	1	0.0625	41	0.111111	3	0.25	0	0	10	0.15873	1	0.0166667	36	0.0978261	11	0.1	14	0.0921053	25	0.101626
	Overall	508	1	341	1	146	1	21	1	113	1	138	1	130	1	77	1	50	1	79	1	19	1	25	1	16	1	369	1	12	1	5	1	63	1	60	1	368	1	110	1	152	1	246	1
Comparing proportions in columnsb
		All	Sex			Age					Place of residence					Education					How often do you visit municiapl forest?
		All	Female	Male	Sex	18-25	26-35	36-45	46-55	56+	Village	Town with less than 25 000 residents	Town 25 000 -100 000 residents	City with 101 000 - 500 000 residents	City with over 500 000 residents	Elementary	Vocational	Secondary	Students	Higher	Once a week or more often	Once per several weeks/ once a month	Several times a year
		(A)	(A)	(B)	(C)	(A)	(B)	(C)	(D)	(E)	(A)	(B)	(C)	(D)	(E)	(A)	(B)	(C)	(D)	(E)	(A)	(B)	(C)
Age	18-25	.			A B	.a	.a	.a	.a	.a	E					C E		E	B C E
	26-35	.				.a	.a	.a	.a	.a						.a	.a			D		C
	36-45	.				.a	.a	.a	.a	.a						.a		D		D
	46-55	.		A		.a	.a	.a	.a	.a						.a	C D			D			B
	56+	.	B			.a	.a	.a	.a	.a			.a			D	.a	D
Results are based on two-tailed tests with a significance level of 0.05. For each significant pair, the category with the smaller column proportion appears below the category with the greater proportion in the columns.
a. This category was not used in the comparisons because its column ratio is zero or one. b. Tests are adjusted for all pairwise comparisons within each inner subtable using the Bonferroni correction.
		Overall		Sex						Age										Place of residence										Education										How often do you visit municiapl forest?
		Overall		Female		Male		Other		18-25		26-35		36-45		46-55		56+		Village		Town with less than 25 000 residents		Town 25 000 -100 000 residents		City with 101 000 - 500 000 residents		City with over 500 000 residents		Elemetary		Vocational		Secondary		Students		Higher		Once a week or more often		Once per several weeks/ once a month		Several times a year
		Number	% of N in the column	Number	% of N in the column	Number	% of N in the column	Number	% of N in the column	Number	% of N in the column	Number	% of N in the column	Number	% of N in the column	Number	% of N in the column	Number	% of N in the column	Number	% of N in the column	Number	% of N in the column	Number	% of N in the column	Number	% of N in the column	Number	% of N in the column	Number	% of N in the column	Number	% of N in the column	Number	% of N in the column	Number	% of N in the column	Number	% of N in the column	Number	% of N in the column	Number	% of N in the column	Number	% of N in the column
Place of residence	Village	79	0.155512	47	0.13783	29	0.19863	3	0.142857	29	0.256637	16	0.115942	14	0.107692	16	0.207792	4	0.08	79	1	0	0	0	0	0	0	0	0	1	0.0833333	2	0.4	9	0.142857	14	0.233333	53	0.144022	6	0.0545455	17	0.111842	56	0.227642
	Town with less than 25 000 residents	19	0.0374016	11	0.0322581	7	0.0479452	1	0.047619	3	0.0265487	2	0.0144928	5	0.0384615	5	0.0649351	4	0.08	0	0	19	1	0	0	0	0	0	0	1	0.0833333	0	0	1	0.015873	2	0.0333333	15	0.0407609	5	0.0454545	1	0.00657895	13	0.0528455
	Town 25 000 -100 000 residents	25	0.0492126	14	0.0410557	10	0.0684932	1	0.047619	7	0.0619469	4	0.0289855	11	0.0846154	3	0.038961	0	0	0	0	0	0	25	1	0	0	0	0	0	0	1	0.2	5	0.0793651	3	0.05	16	0.0434783	4	0.0363636	4	0.0263158	17	0.0691057
	City with 101 000 - 500 000 residents	16	0.0314961	12	0.0351906	4	0.0273973	0	0	3	0.0265487	7	0.0507246	3	0.0230769	2	0.025974	1	0.02	0	0	0	0	0	0	16	1	0	0	0	0	0	0	3	0.047619	3	0.05	10	0.0271739	1	0.00909091	2	0.0131579	13	0.0528455
	City with over 500 000 residents	369	0.726378	257	0.753666	96	0.657534	16	0.761905	71	0.628319	109	0.789855	97	0.746154	51	0.662338	41	0.82	0	0	0	0	0	0	0	0	369	1	10	0.833333	2	0.4	45	0.714286	38	0.633333	274	0.744565	94	0.854545	128	0.842105	147	0.597561
	Overall	508	1	341	1	146	1	21	1	113	1	138	1	130	1	77	1	50	1	79	1	19	1	25	1	16	1	369	1	12	1	5	1	63	1	60	1	368	1	110	1	152	1	246	1
Comparing proportions in columnsb
		All	Sex			Age					Place of residence					Education					How often do you visit municiapl forest?
		All	Female	Male	Sex	18-25	26-35	36-45	46-55	56+	Village	Town with less than 25 000 residents	Town 25 000 -100 000 residents	City with 101 000 - 500 000 residents	City with over 500 000 residents	Elementary	Vocational	Secondary	Students	Higher	Once a week or more often	Once per several weeks/ once a month	Several times a year
		(A)	(A)	(B)	(C)	(A)	(B)	(C)	(D)	(E)	(A)	(B)	(C)	(D)	(E)	(A)	(B)	(C)	(D)	(E)	(A)	(B)	(C)
Place of residence	Village	.				B C					.a	.a	.a	.a	.a								A B
	Town with less than 25 000 residents	.									.a	.a	.a	.a	.a		.a						B
	Town 25 000 -100 000 residents	.								.a	.a	.a	.a	.a	.a	.a
	City with 101 000 - 500 000 residents	.			.a						.a	.a	.a	.a	.a	.a	.a
	City with over 500 000 residents	.					A				.a	.a	.a	.a	.a						C	C
Results are based on two-tailed tests with a significance level of 0.05. For each significant pair, the category with the smaller column proportion appears below the category with the greater proportion in the columns.
a. This category was not used in the comparisons because its column ratio is zero or one. b. Tests are adjusted for all pairwise comparisons within each inner subtable using the Bonferroni correction.
		Overall		Sex						Age										Place of residence										Education										How often do you visit municiapl forest?
		Overall		Female		Male		Other		18-25		26-35		36-45		46-55		56+		Village		Town with less than 25 000 residents		Town 25 000 -100 000 residents		City with 101 000 - 500 000 residents		City with over 500 000 residents		Elemetary		Vocational		Secondary		Students		Higher		Once a week or more often		Once per several weeks/ once a month		Several times a year
		Number	% of N in the column	Number	% of N in the column	Number	% of N in the column	Number	% of N in the column	Number	% of N in the column	Number	% of N in the column	Number	% of N in the column	Number	% of N in the column	Number	% of N in the column	Number	% of N in the column	Number	% of N in the column	Number	% of N in the column	Number	% of N in the column	Number	% of N in the column	Number	% of N in the column	Number	% of N in the column	Number	% of N in the column	Number	% of N in the column	Number	% of N in the column	Number	% of N in the column	Number	% of N in the column	Number	% of N in the column
Education	Elementary	12	0.023622	6	0.0175953	6	0.0410959	0	0	9	0.079646	0	0	0	0	0	0	3	0.06	1	0.0126582	1	0.0526316	0	0	0	0	10	0.0271003	12	1	0	0	0	0	0	0	0	0	1	0.00909091	1	0.00657895	10	0.0406504
	Vocational	5	0.00984252	3	0.00879765	2	0.0136986	0	0	1	0.00884956	0	0	1	0.00769231	3	0.038961	0	0	2	0.0253165	0	0	1	0.04	0	0	2	0.00542005	0	0	5	1	0	0	0	0	0	0	1	0.00909091	1	0.00657895	3	0.0121951
	Secondary	63	0.124016	39	0.11437	22	0.150685	2	0.0952381	20	0.176991	12	0.0869565	14	0.107692	7	0.0909091	10	0.2	9	0.113924	1	0.0526316	5	0.2	3	0.1875	45	0.121951	0	0	0	0	63	1	0	0	0	0	13	0.118182	19	0.125	31	0.126016
	Students	60	0.11811	33	0.0967742	18	0.123288	9	0.428571	50	0.442478	7	0.0507246	1	0.00769231	1	0.012987	1	0.02	14	0.177215	2	0.105263	3	0.12	3	0.1875	38	0.102981	0	0	0	0	0	0	60	1	0	0	12	0.109091	21	0.138158	27	0.109756
	Higher	368	0.724409	260	0.762463	98	0.671233	10	0.47619	33	0.292035	119	0.862319	114	0.876923	66	0.857143	36	0.72	53	0.670886	15	0.789474	16	0.64	10	0.625	274	0.742547	0	0	0	0	0	0	0	0	368	1	83	0.754545	110	0.723684	175	0.711382
	Overall	508	1	341	1	146	1	21	1	113	1	138	1	130	1	77	1	50	1	79	1	19	1	25	1	16	1	369	1	12	1	5	1	63	1	60	1	368	1	110	1	152	1	246	1
Comparing proportions in columnsb
		All	Sex			Age					Place of residence					Education					How often do you visit municiapl forest?
		All	Female	Male	Sex	18-25	26-35	36-45	46-55	56+	Village	Town with less than 25 000 residents	Town 25 000 -100 000 residents	City with 101 000 - 500 000 residents	City with over 500 000 residents	Elementary	Vocational	Secondary	Students	Higher	Once a week or more often	Once per several weeks/ once a month	Several times a year
		(A)	(A)	(B)	(C)	(A)	(B)	(C)	(D)	(E)	(A)	(B)	(C)	(D)	(E)	(A)	(B)	(C)	(D)	(E)	(A)	(B)	(C)
Education	Elementary	.			.a		.a	.a	.a				.a	.a		.a	.a	.a	.a	.a
	Vocational	.			.a		.a			.a		.a		.a		.a	.a	.a	.a	.a
	Secondary	.														.a	.a	.a	.a	.a
	Students	.			A B	B C D E										.a	.a	.a	.a	.a
	Higher	.	C				A	A	A	A						.a	.a	.a	.a	.a
Results are based on two-tailed tests with a significance level of 0.05. For each significant pair, the category with the smaller column proportion appears below the category with the greater proportion in the columns.
a. This category was not used in the comparisons because its column ratio is zero or one. b. Tests are adjusted for all pairwise comparisons within each inner subtable using the Bonferroni correction.
		Overall		Sex						Age										Place of residence										Education										How often do you visit municiapl forest?
		Overall		Female		Male		Other		18-25		26-35		36-45		46-55		56+		Village		Town with less than 25 000 residents		Town 25 000 -100 000 residents		City with 101 000 - 500 000 residents		City with over 500 000 residents		Elemetary		Vocational		Secondary		Students		Higher		Once a week or more often		Once per several weeks/ once a month		Several times a year
		Number	% of N in the column	Number	% of N in the column	Number	% of N in the column	Number	% of N in the column	Number	% of N in the column	Number	% of N in the column	Number	% of N in the column	Number	% of N in the column	Number	% of N in the column	Number	% of N in the column	Number	% of N in the column	Number	% of N in the column	Number	% of N in the column	Number	% of N in the column	Number	% of N in the column	Number	% of N in the column	Number	% of N in the column	Number	% of N in the column	Number	% of N in the column	Number	% of N in the column	Number	% of N in the column	Number	% of N in the column
How often do you visit municiapl forest?	no	59	0.116601	40	0.117647	19	0.131034	0	0	11	0.0982143	18	0.130435	15	0.116279	7	0.0909091	8	0.16	11	0.141026	7	0.368421	4	0.16	6	0.375	31	0.0842391	5	0.454545	0	0	7	0.111111	5	0.0833333	42	0.114441	2	0.0183486	2	0.0131579	55	0.22449
	yes	447	0.883399	300	0.882353	126	0.868966	21	1	101	0.901786	120	0.869565	114	0.883721	70	0.909091	42	0.84	67	0.858974	12	0.631579	21	0.84	10	0.625	337	0.915761	6	0.545455	5	1	56	0.888889	55	0.916667	325	0.885559	107	0.981651	150	0.986842	190	0.77551
	all	506	1	340	1	145	1	21	1	112	1	138	1	129	1	77	1	50	1	78	1	19	1	25	1	16	1	368	1	11	1	5	1	63	1	60	1	367	1	109	1	152	1	245	1
Comparing proportions in columnsb
		All	Sex			Age					Place of residence					Education					How often do you visit municiapl forest?
		All	Female	Male	Sex	18-25	26-35	36-45	46-55	56+	Village	Town with less than 25 000 residents	Town 25 000 -100 000 residents	City with 101 000 - 500 000 residents	City with over 500 000 residents	Elementary	Vocational	Secondary	Students	Higher	Once a week or more often	Once per several weeks/ once a month	Several times a year
		(A)	(A)	(B)	(C)	(A)	(B)	(C)	(D)	(E)	(A)	(B)	(C)	(D)	(E)	(A)	(B)	(C)	(D)	(E)	(A)	(B)	(C)
How often do you visit municiapl forest?	no	.			.a							E		E		C D E	.a						A B
	yes	.			.a										B D		.a	A	A	A	C	C
Results are based on two-tailed tests with a significance level of 0.05. For each significant pair, the category with the smaller column proportion appears below the category with the greater proportion in the columns.
a. This category was not used in the comparisons because its column ratio is zero or one. b. Tests are adjusted for all pairwise comparisons within each inner subtable using the Bonferroni correction.
		Overall		Sex						Age										Place of residence										Education										How often do you visit municiapl forest?
		Overall		Female		Male		Other		18-25		26-35		36-45		46-55		56+		Village		Town with less than 25 000 residents		Town 25 000 -100 000 residents		City with 101 000 - 500 000 residents		City with over 500 000 residents		Elemetary		Vocational		Secondary		Students		Higher		Once a week or more often		Once per several weeks/ once a month		Several times a year
		Number	% of N in the column	Number	% of N in the column	Number	% of N in the column	Number	% of N in the column	Number	% of N in the column	Number	% of N in the column	Number	% of N in the column	Number	% of N in the column	Number	% of N in the column	Number	% of N in the column	Number	% of N in the column	Number	% of N in the column	Number	% of N in the column	Number	% of N in the column	Number	% of N in the column	Number	% of N in the column	Number	% of N in the column	Number	% of N in the column	Number	% of N in the column	Number	% of N in the column	Number	% of N in the column	Number	% of N in the column
How often do you visit municiapl forest?	Everyday	7	0.0137795	6	0.0175953	1	0.00684932	0	0	1	0.00884956	3	0.0217391	1	0.00769231	1	0.012987	1	0.02	2	0.0253165	1	0.0526316	0	0	0	0	4	0.0108401	0	0	0	0	1	0.015873	1	0.0166667	5	0.013587	7	0.0636364	0	0	0	0
	Several times a week	33	0.0649606	20	0.058651	12	0.0821918	1	0.047619	3	0.0265487	5	0.0362319	15	0.115385	7	0.0909091	3	0.06	1	0.0126582	1	0.0526316	2	0.08	1	0.0625	28	0.0758808	0	0	1	0.2	2	0.031746	0	0	30	0.0815217	33	0.3	0	0	0	0
	Once a week	70	0.137795	44	0.129032	25	0.171233	1	0.047619	13	0.115044	21	0.152174	19	0.146154	10	0.12987	7	0.14	3	0.0379747	3	0.157895	2	0.08	0	0	62	0.168022	1	0.0833333	0	0	10	0.15873	11	0.183333	48	0.130435	70	0.636364	0	0	0	0
	Once per several weeks	68	0.133858	49	0.143695	13	0.0890411	6	0.285714	18	0.159292	23	0.166667	13	0.1	6	0.0779221	8	0.16	8	0.101266	1	0.0526316	3	0.12	0	0	56	0.151762	0	0	1	0.2	7	0.111111	13	0.216667	47	0.127717	0	0	68	0.447368	0	0
	Once a month	84	0.165354	54	0.158358	26	0.178082	4	0.190476	16	0.141593	33	0.23913	21	0.161538	8	0.103896	6	0.12	9	0.113924	0	0	1	0.04	2	0.125	72	0.195122	1	0.0833333	0	0	12	0.190476	8	0.133333	63	0.171196	0	0	84	0.552632	0	0
	Several times a year	246	0.484252	168	0.492669	69	0.472603	9	0.428571	62	0.548673	53	0.384058	61	0.469231	45	0.584416	25	0.5	56	0.708861	13	0.684211	17	0.68	13	0.8125	147	0.398374	10	0.833333	3	0.6	31	0.492063	27	0.45	175	0.475543	0	0	0	0	246	1
	All	508	1	341	1	146	1	21	1	113	1	138	1	130	1	77	1	50	1	79	1	19	1	25	1	16	1	369	1	12	1	5	1	63	1	60	1	368	1	110	1	152	1	246	1
Comparing proportions in columnsb
		All	Sex			Age					Place of residence					Education					How often do you visit municiapl forest?
		All	Female	Male	Sex	18-25	26-35	36-45	46-55	56+	Village	Town with less than 25 000 residents	Town 25 000 -100 000 residents	City with 101 000 - 500 000 residents	City with over 500 000 residents	Elementary	Vocational	Secondary	Students	Higher	Once a week or more often	Once per several weeks/ once a month	Several times a year
		(A)	(A)	(B)	(C)	(A)	(B)	(C)	(D)	(E)	(A)	(B)	(C)	(D)	(E)	(A)	(B)	(C)	(D)	(E)	(A)	(B)	(C)
How often do you visit municiapl forest?	Everyday	.			.a								.a	.a		.a	.a					.a	.a
	Several times a week	.														.a			.a			.a	.a
	Once a week	.												.a	A		.a					.a	.a
	Once per several weeks	.			B									.a		.a					.a		.a
	Once a month	.										.a					.a				.a		.a
	Several times a year	.							B		E			E							.a	.a	.a
Results are based on two-tailed tests with a significance level of 0.05. For each significant pair, the category with the smaller column proportion appears below the category with the greater proportion in the columns.
a. This category was not used in the comparisons because its column ratio is zero or one. b. Tests are adjusted for all pairwise comparisons within each inner subtable using the Bonferroni correction.
		Overall		Sex						Age										Place of residence										Education										How often do you visit municiapl forest?
		Overall		Female		Male		Other		18-25		26-35		36-45		46-55		56+		Village		Town with less than 25 000 residents		Town 25 000 -100 000 residents		City with 101 000 - 500 000 residents		City with over 500 000 residents		Elemetary		Vocational		Secondary		Students		Higher		Once a week or more often		Once per several weeks/ once a month		Several times a year
		Number	% of N in the column	Number	% of N in the column	Number	% of N in the column	Number	% of N in the column	Number	% of N in the column	Number	% of N in the column	Number	% of N in the column	Number	% of N in the column	Number	% of N in the column	Number	% of N in the column	Number	% of N in the column	Number	% of N in the column	Number	% of N in the column	Number	% of N in the column	Number	% of N in the column	Number	% of N in the column	Number	% of N in the column	Number	% of N in the column	Number	% of N in the column	Number	% of N in the column	Number	% of N in the column	Number	% of N in the column
Which of the forests do you visit? Choose five ansewrs.	Las Kabacki	252	0.496063	162	0.475073	83	0.568493	7	0.333333	75	0.663717	56	0.405797	62	0.476923	38	0.493506	21	0.42	43	0.544304	9	0.473684	12	0.48	8	0.5	180	0.487805	4	0.333333	3	0.6	31	0.492063	38	0.633333	176	0.478261	49	0.445455	70	0.460526	133	0.54065
	Las Bielański	210	0.413386	139	0.407625	63	0.431507	8	0.380952	35	0.309735	68	0.492754	61	0.469231	27	0.350649	19	0.38	35	0.443038	5	0.263158	10	0.4	3	0.1875	157	0.425474	2	0.166667	2	0.4	33	0.52381	15	0.25	158	0.429348	47	0.427273	71	0.467105	92	0.373984
	Las Młociński	108	0.212598	64	0.187683	36	0.246575	8	0.380952	23	0.20354	31	0.224638	30	0.230769	15	0.194805	9	0.18	16	0.202532	5	0.263158	7	0.28	1	0.0625	79	0.214092	2	0.166667	1	0.2	16	0.253968	14	0.233333	75	0.203804	32	0.290909	37	0.243421	39	0.158537
	Las Bemowski	102	0.200787	69	0.202346	30	0.205479	3	0.142857	10	0.0884956	31	0.224638	32	0.246154	20	0.25974	9	0.18	17	0.21519	2	0.105263	4	0.16	3	0.1875	76	0.205962	4	0.333333	0	0	8	0.126984	7	0.116667	83	0.225543	22	0.2	39	0.256579	41	0.166667
	Park Młociński	99	0.194882	56	0.164223	37	0.253425	6	0.285714	17	0.150442	30	0.217391	30	0.230769	16	0.207792	6	0.12	13	0.164557	6	0.315789	5	0.2	0	0	75	0.203252	2	0.166667	2	0.4	12	0.190476	11	0.183333	72	0.195652	24	0.218182	36	0.236842	39	0.158537
	Las na Kole	63	0.124016	42	0.123167	19	0.130137	2	0.0952381	7	0.0619469	15	0.108696	21	0.161538	13	0.168831	7	0.14	9	0.113924	0	0	1	0.04	1	0.0625	52	0.140921	1	0.0833333	0	0	3	0.047619	7	0.116667	52	0.141304	14	0.127273	23	0.151316	26	0.105691
	Olszynka Grochowska	41	0.0807087	26	0.0762463	13	0.0890411	2	0.0952381	10	0.0884956	13	0.0942029	11	0.0846154	3	0.038961	4	0.08	7	0.0886076	0	0	4	0.16	3	0.1875	27	0.0731707	1	0.0833333	0	0	4	0.0634921	3	0.05	33	0.0896739	9	0.0818182	13	0.0855263	19	0.0772358
	Las Bródno	41	0.0807087	32	0.0938416	6	0.0410959	3	0.142857	10	0.0884956	12	0.0869565	8	0.0615385	4	0.0519481	7	0.14	6	0.0759494	1	0.0526316	2	0.08	0	0	32	0.0867209	0	0	0	0	4	0.0634921	7	0.116667	30	0.0815217	5	0.0454545	17	0.111842	19	0.0772358
	Park Olszyna	40	0.0787402	27	0.0791789	12	0.0821918	1	0.047619	8	0.0707965	13	0.0942029	11	0.0846154	4	0.0519481	4	0.08	2	0.0253165	1	0.0526316	1	0.04	0	0	36	0.097561	1	0.0833333	0	0	7	0.111111	6	0.1	26	0.0706522	7	0.0636364	17	0.111842	16	0.0650407
	Las Sobieskiego	29	0.0570866	16	0.0469208	13	0.0890411	0	0	9	0.079646	4	0.0289855	5	0.0384615	9	0.116883	2	0.04	7	0.0886076	1	0.0526316	3	0.12	0	0	18	0.0487805	0	0	0	0	4	0.0634921	5	0.0833333	20	0.0543478	9	0.0818182	3	0.0197368	17	0.0691057
	Las Lindego	8	0.015748	5	0.0146628	3	0.0205479	0	0	0	0	6	0.0434783	2	0.0153846	0	0	0	0	0	0	0	0	0	0	0	0	8	0.0216802	0	0	0	0	0	0	1	0.0166667	7	0.0190217	3	0.0272727	4	0.0263158	1	0.00406504
	Kampinoski Park Narodowy	6	0.011811	4	0.0117302	2	0.0136986	0	0	0	0	2	0.0144928	2	0.0153846	1	0.012987	1	0.02	1	0.0126582	0	0	0	0	0	0	5	0.0135501	0	0	0	0	1	0.015873	1	0.0166667	4	0.0108696	0	0	4	0.0263158	2	0.00813008
	Inne	40	0.0787402	30	0.0879765	10	0.0684932	0	0	3	0.0265487	12	0.0869565	9	0.0692308	9	0.116883	7	0.14	3	0.0379747	4	0.210526	2	0.08	2	0.125	29	0.0785908	2	0.166667	0	0	4	0.0634921	1	0.0166667	33	0.0896739	15	0.136364	8	0.0526316	17	0.0691057
	Ogółem	508	1	341	1	146	1	21	1	113	1	138	1	130	1	77	1	50	1	79	1	19	1	25	1	16	1	369	1	12	1	5	1	63	1	60	1	368	1	110	1	152	1	246	1
Comparing proportions in columns
		All	Sex			Age					Place of residence					Education					How often do you visit municiapl forest?
		All	Female	Male	Sex	18-25	26-35	36-45	46-55	56+	Village	Town with less than 25 000 residents	Town 25 000 -100 000 residents	City with 101 000 - 500 000 residents	City with over 500 000 residents	Elementary	Vocational	Secondary	Students	Higher	Once a week or more often	Once per several weeks/ once a month	Several times a year
		(A)	(A)	(B)	(C)	(A)	(B)	(C)	(D)	(E)	(A)	(B)	(C)	(D)	(E)	(A)	(B)	(C)	(D)	(E)	(A)	(B)	(C)
Which of the forests do you visit? Choose five ansewrs.	Las Kabacki	.		C		B C D E													E
	Las Bielański	.					A D	A										A D		D
	Las Młociński	.			A																C	C
	Las Bemowski	.					A	A	A								.a					C
	Park Młociński	.		A										.a
	Las na Kole	.						A	A			.a					.a			C
	Olszynka Grochowska	.										.a					.a
	Las Bródno	.	B											.a		.a	.a
	Park Olszyna	.												.a	A		.a
	Las Sobieskiego	.			.a				B C					.a		.a	.a				B		B
	Las Lindego	.			.a	.a			.a	.a	.a	.a	.a	.a		.a	.a	.a
	Kampinoski Park Narodowy	.			.a	.a						.a	.a	.a		.a	.a				.a
	Inne	.			.a		A		A	A		A E				D	.a				B C
Results are based on two-tailed tests with a significance level of 0.05. For each significant pair, the category with the smaller column proportion appears below the category with the greater proportion in the columns.
a. This category was not used in the comparisons because its column ratio is zero or one. b. Tests are adjusted for all pairwise comparisons within each inner subtable using the Bonferroni correction.
		Overall		Sex						Age										Place of residence										Education										How often do you visit municiapl forest?
		Overall		Female		Male		Other		18-25		26-35		36-45		46-55		56+		Village		Town with less than 25 000 residents		Town 25 000 -100 000 residents		City with 101 000 - 500 000 residents		City with over 500 000 residents		Elemetary		Vocational		Secondary		Students		Higher		Once a week or more often		Once per several weeks/ once a month		Several times a year
		Number	% of N in the column	Number	% of N in the column	Number	% of N in the column	Number	% of N in the column	Number	% of N in the column	Number	% of N in the column	Number	% of N in the column	Number	% of N in the column	Number	% of N in the column	Number	% of N in the column	Number	% of N in the column	Number	% of N in the column	Number	% of N in the column	Number	% of N in the column	Number	% of N in the column	Number	% of N in the column	Number	% of N in the column	Number	% of N in the column	Number	% of N in the column	Number	% of N in the column	Number	% of N in the column	Number	% of N in the column
In the municipal forest you most appreciate? Choose five answers.	Connectness with nature	455	0.899209	305	0.897059	131	0.903448	19	0.904762	96	0.849558	121	0.889706	120	0.923077	72	0.935065	46	0.92	64	0.820513	15	0.789474	22	0.88	14	0.875	340	0.923913	8	0.666667	5	1	54	0.857143	53	0.883333	335	0.915301	101	0.918182	143	0.940789	211	0.864754
	Beautiful landscapes	321	0.634387	220	0.647059	86	0.593103	15	0.714286	73	0.646018	90	0.661765	78	0.6	49	0.636364	31	0.62	42	0.538462	11	0.578947	15	0.6	11	0.6875	242	0.657609	6	0.5	4	0.8	40	0.634921	38	0.633333	233	0.636612	73	0.663636	98	0.644737	150	0.614754
	Comfortable hikig trails	283	0.559289	197	0.579412	75	0.517241	11	0.52381	70	0.619469	74	0.544118	70	0.538462	39	0.506494	30	0.6	38	0.487179	6	0.315789	15	0.6	9	0.5625	215	0.584239	9	0.75	2	0.4	38	0.603175	35	0.583333	199	0.543716	62	0.563636	88	0.578947	133	0.545082
	Possibility of doing sports	131	0.258893	84	0.247059	41	0.282759	6	0.285714	29	0.256637	34	0.25	45	0.346154	17	0.220779	6	0.12	20	0.25641	3	0.157895	11	0.44	6	0.375	91	0.247283	3	0.25	2	0.4	10	0.15873	11	0.183333	105	0.286885	46	0.418182	33	0.217105	52	0.213115
	Picnic sites	116	0.229249	82	0.241176	28	0.193103	6	0.285714	44	0.389381	32	0.235294	23	0.176923	9	0.116883	8	0.16	25	0.320513	4	0.210526	4	0.16	2	0.125	81	0.220109	3	0.25	1	0.2	18	0.285714	24	0.4	70	0.191257	15	0.136364	34	0.223684	67	0.27459
	Playgrounds	52	0.102767	40	0.117647	12	0.0827586	0	0	6	0.0530973	19	0.139706	13	0.1	7	0.0909091	7	0.14	12	0.153846	0	0	2	0.08	2	0.125	36	0.0978261	4	0.333333	0	0	7	0.111111	2	0.0333333	39	0.106557	10	0.0909091	14	0.0921053	28	0.114754
	Bike paths	6	0.0118577	3	0.00882353	3	0.0206897	0	0	0	0	2	0.0147059	2	0.0153846	2	0.025974	0	0	0	0	0	0	1	0.04	0	0	5	0.013587	0	0	0	0	0	0	1	0.0166667	5	0.0136612	2	0.0181818	1	0.00657895	3	0.0122951
	Silence	6	0.0118577	2	0.00588235	4	0.0275862	0	0	0	0	2	0.0147059	1	0.00769231	3	0.038961	0	0	1	0.0128205	0	0	1	0.04	0	0	4	0.0108696	0	0	0	0	0	0	0	0	6	0.0163934	5	0.0454545	0	0	1	0.00409836
	Close distance	3	0.00592885	3	0.00882353	0	0	0	0	0	0	3	0.0220588	0	0	0	0	0	0	0	0	0	0	0	0	0	0	3	0.00815217	0	0	0	0	1	0.015873	0	0	2	0.00546448	0	0	2	0.0131579	1	0.00409836
	Calm and space	2	0.00395257	1	0.00294118	1	0.00689655	0	0	0	0	0	0	1	0.00769231	0	0	1	0.02	0	0	0	0	0	0	0	0	2	0.00543478	0	0	0	0	0	0	0	0	2	0.00546448	1	0.00909091	1	0.00657895	0	0
	Possibility of walking with a dog	1	0.00197628	1	0.00294118	0	0	0	0	0	0	0	0	1	0.00769231	0	0	0	0	0	0	0	0	0	0	0	0	1	0.00271739	0	0	0	0	0	0	0	0	1	0.00273224	0	0	0	0	1	0.00409836
	Other	10	0.0197628	7	0.0205882	3	0.0206897	0	0	1	0.00884956	2	0.0147059	4	0.0307692	2	0.025974	1	0.02	0	0	1	0.0526316	0	0	1	0.0625	8	0.0217391	0	0	0	0	3	0.047619	0	0	7	0.0191257	3	0.0272727	2	0.0131579	5	0.0204918
	All	506	1	340	1	145	1	21	1	113	1	136	1	130	1	77	1	50	1	78	1	19	1	25	1	16	1	368	1	12	1	5	1	63	1	60	1	366	1	110	1	152	1	244	1
Comparing proportions in columns
		All	Sex			Age					Place of residence					Education					How often do you visit municiapl forest?
		All	Female	Male	Sex	18-25	26-35	36-45	46-55	56+	Village	Town with less than 25 000 residents	Town 25 000 -100 000 residents	City with 101 000 - 500 000 residents	City with over 500 000 residents	Elementary	Vocational	Secondary	Students	Higher	Once a week or more often	Once per several weeks/ once a month	Several times a year
		(A)	(A)	(B)	(C)	(A)	(B)	(C)	(D)	(E)	(A)	(B)	(C)	(D)	(E)	(A)	(B)	(C)	(D)	(E)	(A)	(B)	(C)
In the municipal forest you most appreciate? Choose five answers.	Connectness with nature	.													A B		.a			A		C
	Beautiful landscapes	.													A
	Comfortable hikig trails	.													B
	Possibility of doing sports	.						E					B E							C	B C
	Picnic sites	.				B C D E	D												E				A
	Playgrounds	.			.a		A					.a				C D E	.a
	Bike paths	.			.a	.a				.a	.a	.a		.a		.a	.a	.a
	Silence	.		A	.a	.a				.a		.a		.a		.a	.a	.a	.a		C	.a
	Close distance	.		.a	.a	.a		.a	.a	.a	.a	.a	.a	.a		.a	.a		.a		.a
	Calm and space	.			.a	.a	.a		.a		.a	.a	.a	.a		.a	.a	.a	.a				.a
	Possibility of walking with a dog	.		.a	.a	.a	.a		.a	.a	.a	.a	.a	.a		.a	.a	.a	.a		.a	.a
	Other	.			.a						.a		.a			.a	.a		.a
Results are based on two-tailed tests with a significance level of 0.05. For each significant pair, the category with the smaller column proportion appears below the category with the greater proportion in the columns.
a. This category was not used in the comparisons because its column ratio is zero or one. b. Tests are adjusted for all pairwise comparisons within each inner subtable using the Bonferroni correction.
		Overall		Sex						Age										Place of residence										Education										How often do you visit municiapl forest?
		Overall		Female		Male		Other		18-25		26-35		36-45		46-55		56+		Village		Town with less than 25 000 residents		Town 25 000 -100 000 residents		City with 101 000 - 500 000 residents		City with over 500 000 residents		Elemetary		Vocational		Secondary		Students		Higher		Once a week or more often		Once per several weeks/ once a month		Several times a year
		Number	% of N in the column	Number	% of N in the column	Number	% of N in the column	Number	% of N in the column	Number	% of N in the column	Number	% of N in the column	Number	% of N in the column	Number	% of N in the column	Number	% of N in the column	Number	% of N in the column	Number	% of N in the column	Number	% of N in the column	Number	% of N in the column	Number	% of N in the column	Number	% of N in the column	Number	% of N in the column	Number	% of N in the column	Number	% of N in the column	Number	% of N in the column	Number	% of N in the column	Number	% of N in the column	Number	% of N in the column
1. Hollow trees pose a greater threat than trees without hollows.	1 - I don't agree at all	254	0.5	168	0.492669	71	0.486301	15	0.714286	37	0.327434	63	0.456522	71	0.546154	51	0.662338	32	0.64	32	0.405063	8	0.421053	15	0.6	6	0.375	193	0.523035	1	0.0833333	2	0.4	31	0.492063	24	0.4	196	0.532609	60	0.545455	75	0.493421	119	0.48374
	2	137	0.269685	96	0.281525	39	0.267123	2	0.0952381	41	0.362832	36	0.26087	35	0.269231	16	0.207792	9	0.18	19	0.240506	8	0.421053	7	0.28	6	0.375	97	0.262873	5	0.416667	1	0.2	19	0.301587	22	0.366667	90	0.244565	28	0.254545	42	0.276316	67	0.272358
	3	74	0.145669	47	0.13783	24	0.164384	3	0.142857	23	0.20354	26	0.188406	15	0.115385	5	0.0649351	5	0.1	18	0.227848	1	0.0526316	1	0.04	2	0.125	52	0.140921	4	0.333333	2	0.4	11	0.174603	10	0.166667	47	0.127717	15	0.136364	26	0.171053	33	0.134146
	4	29	0.0570866	21	0.0615836	8	0.0547945	0	0	8	0.0707965	9	0.0652174	8	0.0615385	2	0.025974	2	0.04	6	0.0759494	2	0.105263	2	0.08	0	0	19	0.0514905	1	0.0833333	0	0	1	0.015873	3	0.05	24	0.0652174	5	0.0454545	8	0.0526316	16	0.0650407
	5 - I totally agree	14	0.0275591	9	0.026393	4	0.0273973	1	0.047619	4	0.0353982	4	0.0289855	1	0.00769231	3	0.038961	2	0.04	4	0.0506329	0	0	0	0	2	0.125	8	0.0216802	1	0.0833333	0	0	1	0.015873	1	0.0166667	11	0.0298913	2	0.0181818	1	0.00657895	11	0.0447154
	All	508	1	341	1	146	1	21	1	113	1	138	1	130	1	77	1	50	1	79	1	19	1	25	1	16	1	369	1	12	1	5	1	63	1	60	1	368	1	110	1	152	1	246	1
Comparing proportions in columns
		All	Sex			Age					Place of residence					Education					How often do you visit municiapl forest?
		All	Female	Male	Sex	18-25	26-35	36-45	46-55	56+	Village	Town with less than 25 000 residents	Town 25 000 -100 000 residents	City with 101 000 - 500 000 residents	City with over 500 000 residents	Elementary	Vocational	Secondary	Students	Higher	Once a week or more often	Once per several weeks/ once a month	Several times a year
		(A)	(A)	(B)	(C)	(A)	(B)	(C)	(D)	(E)	(A)	(B)	(C)	(D)	(E)	(A)	(B)	(C)	(D)	(E)	(A)	(B)	(C)
1. Old trees increase the attractiveness of municipal forests.	1 - I don't agree at all	.						A	A B	A										A
	2	.
	3	.
	4	.			.a									.a			.a
	5 - I totally agree	.										.a	.a	E			.a
Results are based on two-tailed tests with a significance level of 0.05. For each significant pair, the category with the smaller column proportion appears below the category with the greater proportion in the columns.
a. This category was not used in the comparisons because its column ratio is zero or one. b. Tests are adjusted for all pairwise comparisons within each inner subtable using the Bonferroni correction.
		Overall		Sex						Age										Place of residence										Education										How often do you visit municiapl forest?
		Overall		Female		Male		Other		18-25		26-35		36-45		46-55		56+		Village		Town with less than 25 000 residents		Town 25 000 -100 000 residents		City with 101 000 - 500 000 residents		City with over 500 000 residents		Elemetary		Vocational		Secondary		Students		Higher		Once a week or more often		Once per several weeks/ once a month		Several times a year
		Number	% of N in the column	Number	% of N in the column	Number	% of N in the column	Number	% of N in the column	Number	% of N in the column	Number	% of N in the column	Number	% of N in the column	Number	% of N in the column	Number	% of N in the column	Number	% of N in the column	Number	% of N in the column	Number	% of N in the column	Number	% of N in the column	Number	% of N in the column	Number	% of N in the column	Number	% of N in the column	Number	% of N in the column	Number	% of N in the column	Number	% of N in the column	Number	% of N in the column	Number	% of N in the column	Number	% of N in the column
2. Old trees are more valuable to the environment than younger trees.	1 - I don't agree at all	6	0.011811	5	0.0146628	1	0.00684932	0	0	0	0	3	0.0217391	2	0.0153846	1	0.012987	0	0	1	0.0126582	0	0	0	0	1	0.0625	4	0.0108401	0	0	0	0	0	0	0	0	6	0.0163043	1	0.00909091	3	0.0197368	2	0.00813008
	2	24	0.0472441	16	0.0469208	7	0.0479452	1	0.047619	12	0.106195	5	0.0362319	3	0.0230769	1	0.012987	3	0.06	2	0.0253165	0	0	3	0.12	0	0	19	0.0514905	0	0	0	0	2	0.031746	5	0.0833333	17	0.0461957	4	0.0363636	9	0.0592105	11	0.0447154
	3	102	0.200787	68	0.199413	30	0.205479	4	0.190476	22	0.19469	42	0.304348	26	0.2	8	0.103896	4	0.08	17	0.21519	1	0.0526316	3	0.12	3	0.1875	78	0.211382	3	0.25	0	0	18	0.285714	11	0.183333	70	0.190217	18	0.163636	35	0.230263	49	0.199187
	4	115	0.226378	72	0.211144	38	0.260274	5	0.238095	33	0.292035	26	0.188406	29	0.223077	19	0.246753	8	0.16	15	0.189873	9	0.473684	6	0.24	3	0.1875	82	0.222222	3	0.25	3	0.6	15	0.238095	16	0.266667	78	0.211957	26	0.236364	34	0.223684	55	0.223577
	5 - I totally agree	261	0.51378	180	0.527859	70	0.479452	11	0.52381	46	0.40708	62	0.449275	70	0.538462	48	0.623377	35	0.7	44	0.556962	9	0.473684	13	0.52	9	0.5625	186	0.504065	6	0.5	2	0.4	28	0.444444	28	0.466667	197	0.535326	61	0.554545	71	0.467105	129	0.52439
	All	508	1	341	1	146	1	21	1	113	1	138	1	130	1	77	1	50	1	79	1	19	1	25	1	16	1	369	1	12	1	5	1	63	1	60	1	368	1	110	1	152	1	246	1
Comparing proportions in columns
		All	Sex			Age					Place of residence					Education					How often do you visit municiapl forest?
		All	Female	Male	Sex	18-25	26-35	36-45	46-55	56+	Village	Town with less than 25 000 residents	Town 25 000 -100 000 residents	City with 101 000 - 500 000 residents	City with over 500 000 residents	Elementary	Vocational	Secondary	Students	Higher	Once a week or more often	Once per several weeks/ once a month	Several times a year
		(A)	(A)	(B)	(C)	(A)	(B)	(C)	(D)	(E)	(A)	(B)	(C)	(D)	(E)	(A)	(B)	(C)	(D)	(E)	(A)	(B)	(C)
2. Old trees are more valuable to the environment than younger trees.	1 - I don't agree at all	.			.a	.a				.a		.a	.a			.a	.a	.a	.a
	2	.										.a		.a		.a	.a
	3	.					D E										.a
	4	.
	5 - I totally agree	.							A	A B
Results are based on two-tailed tests with a significance level of 0.05. For each significant pair, the category with the smaller column proportion appears below the category with the greater proportion in the columns.
a. This category was not used in the comparisons because its column ratio is zero or one. b. Tests are adjusted for all pairwise comparisons within each inner subtable using the Bonferroni correction.
		Overall		Sex						Age										Place of residence										Education										How often do you visit municiapl forest?
		Overall		Female		Male		Other		18-25		26-35		36-45		46-55		56+		Village		Town with less than 25 000 residents		Town 25 000 -100 000 residents		City with 101 000 - 500 000 residents		City with over 500 000 residents		Elemetary		Vocational		Secondary		Students		Higher		Once a week or more often		Once per several weeks/ once a month		Several times a year
		Number	% of N in the column	Number	% of N in the column	Number	% of N in the column	Number	% of N in the column	Number	% of N in the column	Number	% of N in the column	Number	% of N in the column	Number	% of N in the column	Number	% of N in the column	Number	% of N in the column	Number	% of N in the column	Number	% of N in the column	Number	% of N in the column	Number	% of N in the column	Number	% of N in the column	Number	% of N in the column	Number	% of N in the column	Number	% of N in the column	Number	% of N in the column	Number	% of N in the column	Number	% of N in the column	Number	% of N in the column
3. It is better to replace an old tree with a younger one.	1 - I don't agree at all	315	0.620079	210	0.615836	91	0.623288	14	0.666667	53	0.469027	79	0.572464	88	0.676923	60	0.779221	35	0.7	41	0.518987	12	0.631579	13	0.52	13	0.8125	236	0.639566	6	0.5	5	1	40	0.634921	31	0.516667	233	0.633152	70	0.636364	95	0.625	150	0.609756
	2	111	0.218504	76	0.222874	30	0.205479	5	0.238095	39	0.345133	30	0.217391	23	0.176923	11	0.142857	8	0.16	17	0.21519	6	0.315789	8	0.32	2	0.125	78	0.211382	3	0.25	0	0	12	0.190476	23	0.383333	73	0.19837	26	0.236364	31	0.203947	54	0.219512
	3	58	0.114173	38	0.111437	19	0.130137	1	0.047619	16	0.141593	22	0.15942	15	0.115385	3	0.038961	2	0.04	15	0.189873	0	0	3	0.12	0	0	40	0.108401	2	0.166667	0	0	10	0.15873	4	0.0666667	42	0.11413	10	0.0909091	18	0.118421	30	0.121951
	4	15	0.0295276	9	0.026393	5	0.0342466	1	0.047619	4	0.0353982	4	0.0289855	3	0.0230769	1	0.012987	3	0.06	5	0.0632911	0	0	1	0.04	0	0	9	0.0243902	1	0.0833333	0	0	1	0.015873	2	0.0333333	11	0.0298913	2	0.0181818	6	0.0394737	7	0.0284553
	5 - I totally agree	9	0.0177165	8	0.0234604	1	0.00684932	0	0	1	0.00884956	3	0.0217391	1	0.00769231	2	0.025974	2	0.04	1	0.0126582	1	0.0526316	0	0	1	0.0625	6	0.0162602	0	0	0	0	0	0	0	0	9	0.0244565	2	0.0181818	2	0.0131579	5	0.0203252
	Overall	508	1	341	1	146	1	21	1	113	1	138	1	130	1	77	1	50	1	79	1	19	1	25	1	16	1	369	1	12	1	5	1	63	1	60	1	368	1	110	1	152	1	246	1
Comparing proportions in columnsb
		All	Sex			Age					Place of residence					Education					How often do you visit municiapl forest?
		All	Female	Male	Sex	18-25	26-35	36-45	46-55	56+	Village	Town with less than 25 000 residents	Town 25 000 -100 000 residents	City with 101 000 - 500 000 residents	City with over 500 000 residents	Elementary	Vocational	Secondary	Students	Higher	Once a week or more often	Once per several weeks/ once a month	Several times a year
		(A)	(A)	(B)	(C)	(A)	(B)	(C)	(D)	(E)	(A)	(B)	(C)	(D)	(E)	(A)	(B)	(C)	(D)	(E)	(A)	(B)	(C)
3. It is better to replace an old tree with a younger one.	1 - I don't agree at all	.						A	A B								.a
	2	.				C D											.a		E
	3	.										.a		.a			.a
	4	.										.a		.a			.a
	5 - I totally agree	.			.a								.a			.a	.a	.a	.a
Results are based on two-tailed tests with a significance level of 0.05. For each significant pair, the category with the smaller column proportion appears below the category with the greater proportion in the columns.
a. This category was not used in the comparisons because its column ratio is zero or one. b. Tests are adjusted for all pairwise comparisons within each inner subtable using the Bonferroni correction.
		Overall		Sex						Age										Place of residence										Education										How often do you visit municiapl forest?
		Overall		Female		Male		Other		18-25		26-35		36-45		46-55		56+		Village		Town with less than 25 000 residents		Town 25 000 -100 000 residents		City with 101 000 - 500 000 residents		City with over 500 000 residents		Elemetary		Vocational		Secondary		Students		Higher		Once a week or more often		Once per several weeks/ once a month		Several times a year
		Number	% of N in the column	Number	% of N in the column	Number	% of N in the column	Number	% of N in the column	Number	% of N in the column	Number	% of N in the column	Number	% of N in the column	Number	% of N in the column	Number	% of N in the column	Number	% of N in the column	Number	% of N in the column	Number	% of N in the column	Number	% of N in the column	Number	% of N in the column	Number	% of N in the column	Number	% of N in the column	Number	% of N in the column	Number	% of N in the column	Number	% of N in the column	Number	% of N in the column	Number	% of N in the column	Number	% of N in the column
4.Fruiting bodies of fungi on the trunk or branches do not mean a death sentence for the tree on which they grow.	1 - I don't agree at all	42	0.0826772	27	0.0791789	14	0.0958904	1	0.047619	9	0.079646	8	0.057971	10	0.0769231	10	0.12987	5	0.1	8	0.101266	1	0.0526316	2	0.08	2	0.125	29	0.0785908	1	0.0833333	0	0	11	0.174603	1	0.0166667	29	0.0788043	9	0.0818182	12	0.0789474	21	0.0853659
	2	34	0.0669291	22	0.0645161	11	0.0753425	1	0.047619	9	0.079646	8	0.057971	11	0.0846154	4	0.0519481	2	0.04	9	0.113924	1	0.0526316	0	0	2	0.125	22	0.0596206	0	0	1	0.2	3	0.047619	6	0.1	24	0.0652174	6	0.0545455	13	0.0855263	15	0.0609756
	3	80	0.15748	50	0.146628	28	0.191781	2	0.0952381	16	0.141593	24	0.173913	23	0.176923	10	0.12987	7	0.14	8	0.101266	4	0.210526	3	0.12	4	0.25	61	0.165312	1	0.0833333	0	0	11	0.174603	9	0.15	59	0.160326	18	0.163636	18	0.118421	44	0.178862
	4	120	0.23622	78	0.228739	35	0.239726	7	0.333333	42	0.371681	28	0.202899	27	0.207692	13	0.168831	10	0.2	21	0.265823	5	0.263158	10	0.4	2	0.125	82	0.222222	4	0.333333	0	0	17	0.269841	20	0.333333	79	0.214674	23	0.209091	40	0.263158	57	0.231707
	5 - I totally agree	232	0.456693	164	0.480938	58	0.39726	10	0.47619	37	0.327434	70	0.507246	59	0.453846	40	0.519481	26	0.52	33	0.417722	8	0.421053	10	0.4	6	0.375	175	0.474255	6	0.5	4	0.8	21	0.333333	24	0.4	177	0.480978	54	0.490909	69	0.453947	109	0.443089
	All	508	1	341	1	146	1	21	1	113	1	138	1	130	1	77	1	50	1	79	1	19	1	25	1	16	1	369	1	12	1	5	1	63	1	60	1	368	1	110	1	152	1	246	1
Comparing proportions in columnsb
		All	Sex			Age					Place of residence					Education					How often do you visit municiapl forest?
		All	Female	Male	Sex	18-25	26-35	36-45	46-55	56+	Village	Town with less than 25 000 residents	Town 25 000 -100 000 residents	City with 101 000 - 500 000 residents	City with over 500 000 residents	Elementary	Vocational	Secondary	Students	Higher	Once a week or more often	Once per several weeks/ once a month	Several times a year
		(A)	(A)	(B)	(C)	(A)	(B)	(C)	(D)	(E)	(A)	(B)	(C)	(D)	(E)	(A)	(B)	(C)	(D)	(E)	(A)	(B)	(C)
4. Fruiting bodies of fungi on the trunk or branches do not mean a death sentence for the tree on which they grow.	1 - I don't agree at all	.															.a	D
	2	.											.a			.a
	3	.															.a
	4	.				B C D											.a
	5 - I totally agree	.					A
Results are based on two-tailed tests with a significance level of 0.05. For each significant pair, the category with the smaller column proportion appears below the category with the greater proportion in the columns.
a. This category was not used in the comparisons because its column ratio is zero or one. b. Tests are adjusted for all pairwise comparisons within each inner subtable using the Bonferroni correction.
		Overall		Sex						Age										Place of residence										Education										How often do you visit municiapl forest?
		Overall		Female		Male		Other		18-25		26-35		36-45		46-55		56+		Village		Town with less than 25 000 residents		Town 25 000 -100 000 residents		City with 101 000 - 500 000 residents		City with over 500 000 residents		Elemetary		Vocational		Secondary		Students		Higher		Once a week or more often		Once per several weeks/ once a month		Several times a year
		Number	% of N in the column	Number	% of N in the column	Number	% of N in the column	Number	% of N in the column	Number	% of N in the column	Number	% of N in the column	Number	% of N in the column	Number	% of N in the column	Number	% of N in the column	Number	% of N in the column	Number	% of N in the column	Number	% of N in the column	Number	% of N in the column	Number	% of N in the column	Number	% of N in the column	Number	% of N in the column	Number	% of N in the column	Number	% of N in the column	Number	% of N in the column	Number	% of N in the column	Number	% of N in the column	Number	% of N in the column
5. Hollow trees pose a greater threat than trees without hollows.	1 - I don't agree at all	235	0.462598	162	0.475073	61	0.417808	12	0.571429	40	0.353982	56	0.405797	63	0.484615	46	0.597403	30	0.6	34	0.43038	11	0.578947	10	0.4	6	0.375	174	0.471545	7	0.583333	2	0.4	27	0.428571	18	0.3	181	0.491848	56	0.509091	71	0.467105	108	0.439024
	2	100	0.19685	71	0.208211	23	0.157534	6	0.285714	24	0.212389	32	0.231884	25	0.192308	10	0.12987	9	0.18	19	0.240506	3	0.157895	6	0.24	0	0	72	0.195122	0	0	0	0	18	0.285714	15	0.25	67	0.182065	24	0.218182	29	0.190789	47	0.191057
	3	103	0.202756	65	0.190616	36	0.246575	2	0.0952381	29	0.256637	27	0.195652	26	0.2	13	0.168831	8	0.16	13	0.164557	3	0.157895	5	0.2	6	0.375	76	0.205962	4	0.333333	1	0.2	11	0.174603	18	0.3	69	0.1875	21	0.190909	30	0.197368	52	0.211382
	4	44	0.0866142	26	0.0762463	17	0.116438	1	0.047619	10	0.0884956	18	0.130435	11	0.0846154	3	0.038961	2	0.04	6	0.0759494	1	0.0526316	1	0.04	4	0.25	32	0.0867209	1	0.0833333	1	0.2	4	0.0634921	5	0.0833333	33	0.0896739	2	0.0181818	18	0.118421	24	0.097561
	5 - I totally agree	26	0.0511811	17	0.0498534	9	0.0616438	0	0	10	0.0884956	5	0.0362319	5	0.0384615	5	0.0649351	1	0.02	7	0.0886076	1	0.0526316	3	0.12	0	0	15	0.0406504	0	0	1	0.2	3	0.047619	4	0.0666667	18	0.048913	7	0.0636364	4	0.0263158	15	0.0609756
	All	508	1	341	1	146	1	21	1	113	1	138	1	130	1	77	1	50	1	79	1	19	1	25	1	16	1	369	1	12	1	5	1	63	1	60	1	368	1	110	1	152	1	246	1
Comparing proportions in columnsb
		All	Sex			Age					Place of residence					Education					How often do you visit municiapl forest?
		All	Female	Male	Sex	18-25	26-35	36-45	46-55	56+	Village	Town with less than 25 000 residents	Town 25 000 -100 000 residents	City with 101 000 - 500 000 residents	City with over 500 000 residents	Elementary	Vocational	Secondary	Students	Higher	Once a week or more often	Once per several weeks/ once a month	Several times a year
		(A)	(A)	(B)	(C)	(A)	(B)	(C)	(D)	(E)	(A)	(B)	(C)	(D)	(E)	(A)	(B)	(C)	(D)	(E)	(A)	(B)	(C)
5. Hollow trees pose a greater threat than trees without hollows.	1 - I don't agree at all	.							A	A
	2	.												.a		.a	.a
	3	.
	4	.																				A	A
	5 - I totally agree	.			.a									.a		.a
Results are based on two-tailed tests with a significance level of 0.05. For each significant pair, the category with the smaller column proportion appears below the category with the greater proportion in the columns.
a. This category was not used in the comparisons because its column ratio is zero or one. b. Tests are adjusted for all pairwise comparisons within each inner subtable using the Bonferroni correction.
		Overall		Sex						Age										Place of residence										Education										How often do you visit municiapl forest?
		Overall		Female		Male		Other		18-25		26-35		36-45		46-55		56+		Village		Town with less than 25 000 residents		Town 25 000 -100 000 residents		City with 101 000 - 500 000 residents		City with over 500 000 residents		Elemetary		Vocational		Secondary		Students		Higher		Once a week or more often		Once per several weeks/ once a month		Several times a year
		Number	% of N in the column	Number	% of N in the column	Number	% of N in the column	Number	% of N in the column	Number	% of N in the column	Number	% of N in the column	Number	% of N in the column	Number	% of N in the column	Number	% of N in the column	Number	% of N in the column	Number	% of N in the column	Number	% of N in the column	Number	% of N in the column	Number	% of N in the column	Number	% of N in the column	Number	% of N in the column	Number	% of N in the column	Number	% of N in the column	Number	% of N in the column	Number	% of N in the column	Number	% of N in the column	Number	% of N in the column
6. Decayed trees inside must be cut down immediately.	1 - I don't agree at all	170	0.334646	109	0.319648	54	0.369863	7	0.333333	25	0.221239	42	0.304348	54	0.415385	34	0.441558	15	0.3	21	0.265823	7	0.368421	11	0.44	7	0.4375	124	0.336043	2	0.166667	1	0.2	19	0.301587	17	0.283333	131	0.355978	41	0.372727	48	0.315789	81	0.329268
	2	106	0.208661	70	0.205279	33	0.226027	3	0.142857	26	0.230088	28	0.202899	28	0.215385	15	0.194805	9	0.18	21	0.265823	3	0.157895	5	0.2	0	0	77	0.208672	3	0.25	2	0.4	13	0.206349	13	0.216667	75	0.203804	27	0.245455	24	0.157895	55	0.223577
	3	127	0.25	94	0.27566	25	0.171233	8	0.380952	27	0.238938	39	0.282609	30	0.230769	14	0.181818	17	0.34	17	0.21519	4	0.210526	4	0.16	7	0.4375	95	0.257453	5	0.416667	0	0	15	0.238095	13	0.216667	94	0.255435	20	0.181818	40	0.263158	67	0.272358
	4	58	0.114173	38	0.111437	17	0.116438	3	0.142857	22	0.19469	13	0.0942029	10	0.0769231	8	0.103896	5	0.1	9	0.113924	3	0.157895	2	0.08	1	0.0625	43	0.116531	2	0.166667	1	0.2	8	0.126984	10	0.166667	37	0.100543	13	0.118182	24	0.157895	21	0.0853659
	5 - I totally agree	47	0.0925197	30	0.0879765	17	0.116438	0	0	13	0.115044	16	0.115942	8	0.0615385	6	0.0779221	4	0.08	11	0.139241	2	0.105263	3	0.12	1	0.0625	30	0.0813008	0	0	1	0.2	8	0.126984	7	0.116667	31	0.0842391	9	0.0818182	16	0.105263	22	0.0894309
	All	508	1	341	1	146	1	21	1	113	1	138	1	130	1	77	1	50	1	79	1	19	1	25	1	16	1	369	1	12	1	5	1	63	1	60	1	368	1	110	1	152	1	246	1
Comparing proportions in columnsb
		All	Sex			Age					Place of residence					Education					How often do you visit municiapl forest?
		All	Female	Male	Sex	18-25	26-35	36-45	46-55	56+	Village	Town with less than 25 000 residents	Town 25 000 -100 000 residents	City with 101 000 - 500 000 residents	City with over 500 000 residents	Elementary	Vocational	Secondary	Students	Higher	Once a week or more often	Once per several weeks/ once a month	Several times a year
		(A)	(A)	(B)	(C)	(A)	(B)	(C)	(D)	(E)	(A)	(B)	(C)	(D)	(E)	(A)	(B)	(C)	(D)	(E)	(A)	(B)	(C)
6. Decayed trees inside must be cut down immediately.	1 - I don't agree at all	.						A	A
	2	.												.a
	3	.	B														.a
	4	.
	5 - I totally agree	.			.a											.a
Results are based on two-tailed tests with a significance level of 0.05. For each significant pair, the category with the smaller column proportion appears below the category with the greater proportion in the columns.
a. This category was not used in the comparisons because its column ratio is zero or one. b. Tests are adjusted for all pairwise comparisons within each inner subtable using the Bonferroni correction.
		Overall		Sex						Age										Place of residence										Education										How often do you visit municiapl forest?
		Overall		Female		Male		Other		18-25		26-35		36-45		46-55		56+		Village		Town with less than 25 000 residents		Town 25 000 -100 000 residents		City with 101 000 - 500 000 residents		City with over 500 000 residents		Elemetary		Vocational		Secondary		Students		Higher		Once a week or more often		Once per several weeks/ once a month		Several times a year
		Number	% of N in the column	Number	% of N in the column	Number	% of N in the column	Number	% of N in the column	Number	% of N in the column	Number	% of N in the column	Number	% of N in the column	Number	% of N in the column	Number	% of N in the column	Number	% of N in the column	Number	% of N in the column	Number	% of N in the column	Number	% of N in the column	Number	% of N in the column	Number	% of N in the column	Number	% of N in the column	Number	% of N in the column	Number	% of N in the column	Number	% of N in the column	Number	% of N in the column	Number	% of N in the column	Number	% of N in the column
7. Old trees increase the attractiveness of municipal forests.	1 - I don't agree at all	4	0.00787402	3	0.00879765	1	0.00684932	0	0	0	0	1	0.00724638	1	0.00769231	2	0.025974	0	0	0	0	0	0	0	0	1	0.0625	3	0.00813008	0	0	0	0	2	0.031746	0	0	2	0.00543478	0	0	1	0.00657895	3	0.0121951
	2	4	0.00787402	1	0.00293255	3	0.0205479	0	0	3	0.0265487	0	0	0	0	1	0.012987	0	0	0	0	1	0.0526316	0	0	0	0	3	0.00813008	0	0	0	0	3	0.047619	0	0	1	0.00271739	2	0.0181818	0	0	2	0.00813008
	3	14	0.0275591	10	0.0293255	4	0.0273973	0	0	4	0.0353982	5	0.0362319	5	0.0384615	0	0	0	0	5	0.0632911	1	0.0526316	0	0	1	0.0625	7	0.0189702	2	0.166667	0	0	1	0.015873	0	0	11	0.0298913	3	0.0272727	1	0.00657895	10	0.0406504
	4	56	0.110236	35	0.102639	17	0.116438	4	0.190476	21	0.185841	19	0.137681	10	0.0769231	3	0.038961	3	0.06	9	0.113924	2	0.105263	2	0.08	0	0	43	0.116531	0	0	0	0	8	0.126984	9	0.15	39	0.105978	9	0.0818182	23	0.151316	24	0.097561
	5 - I totally agree	430	0.846457	292	0.856305	121	0.828767	17	0.809524	85	0.752212	113	0.818841	114	0.876923	71	0.922078	47	0.94	65	0.822785	15	0.789474	23	0.92	14	0.875	313	0.848238	10	0.833333	5	1	49	0.777778	51	0.85	315	0.855978	96	0.872727	127	0.835526	207	0.841463
	All	508	1	341	1	146	1	21	1	113	1	138	1	130	1	77	1	50	1	79	1	19	1	25	1	16	1	369	1	12	1	5	1	63	1	60	1	368	1	110	1	152	1	246	1
Comparing proportions in columnsb
		All	Sex			Age					Place of residence					Education					How often do you visit municiapl forest?
		All	Female	Male	Sex	18-25	26-35	36-45	46-55	56+	Village	Town with less than 25 000 residents	Town 25 000 -100 000 residents	City with 101 000 - 500 000 residents	City with over 500 000 residents	Elementary	Vocational	Secondary	Students	Higher	Once a week or more often	Once per several weeks/ once a month	Several times a year
		(A)	(A)	(B)	(C)	(A)	(B)	(C)	(D)	(E)	(A)	(B)	(C)	(D)	(E)	(A)	(B)	(C)	(D)	(E)	(A)	(B)	(C)
7. Old trees increase the attractiveness of municipal forests.	1 - I don't agree at all	.			.a	.a				.a	.a	.a	.a	E		.a	.a	E	.a		.a
	2	.		A	.a		.a	.a		.a	.a		.a	.a		.a	.a	E	.a			.a
	3	.			.a				.a	.a			.a			C E	.a		.a
	4	.				D								.a		.a	.a
	5 - I totally agree	.							A	A							.a
Results are based on two-tailed tests with a significance level of 0.05. For each significant pair, the category with the smaller column proportion appears below the category with the greater proportion in the columns.
a. This category was not used in the comparisons because its column ratio is zero or one. b. Tests are adjusted for all pairwise comparisons within each inner subtable using the Bonferroni correction.
		Overall		Sex						Age										Place of residence										Education										How often do you visit municiapl forest?
		Overall		Female		Male		Other		18-25		26-35		36-45		46-55		56+		Village		Town with less than 25 000 residents		Town 25 000 -100 000 residents		City with 101 000 - 500 000 residents		City with over 500 000 residents		Elemetary		Vocational		Secondary		Students		Higher		Once a week or more often		Once per several weeks/ once a month		Several times a year
		Number	% of N in the column	Number	% of N in the column	Number	% of N in the column	Number	% of N in the column	Number	% of N in the column	Number	% of N in the column	Number	% of N in the column	Number	% of N in the column	Number	% of N in the column	Number	% of N in the column	Number	% of N in the column	Number	% of N in the column	Number	% of N in the column	Number	% of N in the column	Number	% of N in the column	Number	% of N in the column	Number	% of N in the column	Number	% of N in the column	Number	% of N in the column	Number	% of N in the column	Number	% of N in the column	Number	% of N in the column
8. Dying trees should be cut down even if they are natural monuments.	1 - I don't agree at all	297	0.584646	194	0.568915	91	0.623288	12	0.571429	43	0.380531	79	0.572464	89	0.684615	54	0.701299	32	0.64	44	0.556962	11	0.578947	18	0.72	8	0.5	216	0.585366	3	0.25	3	0.6	34	0.539683	26	0.433333	231	0.627717	74	0.672727	79	0.519737	144	0.585366
	2	113	0.222441	81	0.237537	27	0.184932	5	0.238095	47	0.415929	27	0.195652	23	0.176923	11	0.142857	5	0.1	18	0.227848	3	0.157895	3	0.12	5	0.3125	84	0.227642	4	0.333333	2	0.4	18	0.285714	22	0.366667	67	0.182065	17	0.154545	43	0.282895	53	0.215447
	3	57	0.112205	44	0.129032	10	0.0684932	3	0.142857	13	0.115044	17	0.123188	11	0.0846154	8	0.103896	8	0.16	9	0.113924	3	0.157895	2	0.08	2	0.125	41	0.111111	3	0.25	0	0	7	0.111111	7	0.116667	40	0.108696	12	0.109091	15	0.0986842	30	0.121951
	4	23	0.0452756	14	0.0410557	8	0.0547945	1	0.047619	5	0.0442478	10	0.0724638	5	0.0384615	1	0.012987	2	0.04	4	0.0506329	1	0.0526316	1	0.04	1	0.0625	16	0.0433604	2	0.166667	0	0	1	0.015873	1	0.0166667	19	0.0516304	1	0.00909091	9	0.0592105	13	0.0528455
	5 - I totally agree	18	0.0354331	8	0.0234604	10	0.0684932	0	0	5	0.0442478	5	0.0362319	2	0.0153846	3	0.038961	3	0.06	4	0.0506329	1	0.0526316	1	0.04	0	0	12	0.0325203	0	0	0	0	3	0.047619	4	0.0666667	11	0.0298913	6	0.0545455	6	0.0394737	6	0.0243902
	All	508	1	341	1	146	1	21	1	113	1	138	1	130	1	77	1	50	1	79	1	19	1	25	1	16	1	369	1	12	1	5	1	63	1	60	1	368	1	110	1	152	1	246	1
Comparing proportions in columnsb
		All	Sex			Age					Place of residence					Education					How often do you visit municiapl forest?
		All	Female	Male	Sex	18-25	26-35	36-45	46-55	56+	Village	Town with less than 25 000 residents	Town 25 000 -100 000 residents	City with 101 000 - 500 000 residents	City with over 500 000 residents	Elementary	Vocational	Secondary	Students	Higher	Once a week or more often	Once per several weeks/ once a month	Several times a year
		(A)	(A)	(B)	(C)	(A)	(B)	(C)	(D)	(E)	(A)	(B)	(C)	(D)	(E)	(A)	(B)	(C)	(D)	(E)	(A)	(B)	(C)
8. Dying trees should be cut down even if they are natural monuments.	1 - I don't agree at all	.					A	A	A	A										D	B
	2	.				B C D E													E			A
	3	.															.a
	4	.															.a
	5 - I totally agree	.		A	.a									.a		.a	.a
Results are based on two-tailed tests with a significance level of 0.05. For each significant pair, the category with the smaller column proportion appears below the category with the greater proportion in the columns.
a. This category was not used in the comparisons because its column ratio is zero or one. b. Tests are adjusted for all pairwise comparisons within each inner subtable using the Bonferroni correction.
		Overall		Sex						Age										Place of residence										Education										How often do you visit municiapl forest?
		Overall		Female		Male		Other		18-25		26-35		36-45		46-55		56+		Village		Town with less than 25 000 residents		Town 25 000 -100 000 residents		City with 101 000 - 500 000 residents		City with over 500 000 residents		Elemetary		Vocational		Secondary		Students		Higher		Once a week or more often		Once per several weeks/ once a month		Several times a year
		Number	% of N in the column	Number	% of N in the column	Number	% of N in the column	Number	% of N in the column	Number	% of N in the column	Number	% of N in the column	Number	% of N in the column	Number	% of N in the column	Number	% of N in the column	Number	% of N in the column	Number	% of N in the column	Number	% of N in the column	Number	% of N in the column	Number	% of N in the column	Number	% of N in the column	Number	% of N in the column	Number	% of N in the column	Number	% of N in the column	Number	% of N in the column	Number	% of N in the column	Number	% of N in the column	Number	% of N in the column
9. Trees in municipal forests should undergo the same care as street trees.	1 - I don't agree at all	238	0.468504	157	0.460411	71	0.486301	10	0.47619	38	0.336283	62	0.449275	71	0.546154	45	0.584416	22	0.44	34	0.43038	8	0.421053	9	0.36	7	0.4375	180	0.487805	3	0.25	3	0.6	22	0.349206	22	0.366667	188	0.51087	68	0.618182	57	0.375	113	0.45935
	2	100	0.19685	64	0.187683	32	0.219178	4	0.190476	28	0.247788	33	0.23913	22	0.169231	12	0.155844	5	0.1	12	0.151899	5	0.263158	9	0.36	5	0.3125	69	0.186992	2	0.166667	0	0	12	0.190476	13	0.216667	73	0.19837	17	0.154545	35	0.230263	48	0.195122
	3	79	0.155512	53	0.155425	21	0.143836	5	0.238095	28	0.247788	17	0.123188	15	0.115385	10	0.12987	9	0.18	19	0.240506	1	0.0526316	3	0.12	2	0.125	54	0.146341	1	0.0833333	0	0	13	0.206349	14	0.233333	51	0.138587	8	0.0727273	30	0.197368	41	0.166667
	4	36	0.0708661	28	0.0821114	8	0.0547945	0	0	9	0.079646	11	0.0797101	9	0.0692308	2	0.025974	5	0.1	5	0.0632911	3	0.157895	1	0.04	0	0	27	0.0731707	1	0.0833333	0	0	4	0.0634921	6	0.1	25	0.0679348	6	0.0545455	12	0.0789474	18	0.0731707
	5 - I totally agree	55	0.108268	39	0.11437	14	0.0958904	2	0.0952381	10	0.0884956	15	0.108696	13	0.1	8	0.103896	9	0.18	9	0.113924	2	0.105263	3	0.12	2	0.125	39	0.105691	5	0.416667	2	0.4	12	0.190476	5	0.0833333	31	0.0842391	11	0.1	18	0.118421	26	0.105691
	All	508	1	341	1	146	1	21	1	113	1	138	1	130	1	77	1	50	1	79	1	19	1	25	1	16	1	369	1	12	1	5	1	63	1	60	1	368	1	110	1	152	1	246	1
Comparing proportions in columnsb
		All	Sex			Age					Place of residence					Education					How often do you visit municiapl forest?
		All	Female	Male	Sex	18-25	26-35	36-45	46-55	56+	Village	Town with less than 25 000 residents	Town 25 000 -100 000 residents	City with 101 000 - 500 000 residents	City with over 500 000 residents	Elementary	Vocational	Secondary	Students	Higher	Once a week or more often	Once per several weeks/ once a month	Several times a year
		(A)	(A)	(B)	(C)	(A)	(B)	(C)	(D)	(E)	(A)	(B)	(C)	(D)	(E)	(A)	(B)	(C)	(D)	(E)	(A)	(B)	(C)
9. Trees in municipal forests should undergo the same care as street trees.	1 - I don't agree at all	.						A	A												B C
	2	.															.a
	3	.															.a					A
	4	.			.a									.a			.a
	5 - I totally agree	.														D E
Results are based on two-tailed tests with a significance level of 0.05. For each significant pair, the category with the smaller column proportion appears below the category with the greater proportion in the columns.
a. This category was not used in the comparisons because its column ratio is zero or one. b. Tests are adjusted for all pairwise comparisons within each inner subtable using the Bonferroni correction.
		Overall		Sex						Age										Place of residence										Education										How often do you visit municiapl forest?
		Overall		Female		Male		Other		18-25		26-35		36-45		46-55		56+		Village		Town with less than 25 000 residents		Town 25 000 -100 000 residents		City with 101 000 - 500 000 residents		City with over 500 000 residents		Elemetary		Vocational		Secondary		Students		Higher		Once a week or more often		Once per several weeks/ once a month		Several times a year
		Number	% of N in the column	Number	% of N in the column	Number	% of N in the column	Number	% of N in the column	Number	% of N in the column	Number	% of N in the column	Number	% of N in the column	Number	% of N in the column	Number	% of N in the column	Number	% of N in the column	Number	% of N in the column	Number	% of N in the column	Number	% of N in the column	Number	% of N in the column	Number	% of N in the column	Number	% of N in the column	Number	% of N in the column	Number	% of N in the column	Number	% of N in the column	Number	% of N in the column	Number	% of N in the column	Number	% of N in the column
10. Cutting branches improves the health of even old trees.	1 - I don't agree at all	105	0.206693	64	0.187683	37	0.253425	4	0.190476	18	0.159292	30	0.217391	26	0.2	24	0.311688	7	0.14	18	0.227848	3	0.157895	5	0.2	5	0.3125	74	0.200542	2	0.166667	0	0	12	0.190476	12	0.2	79	0.214674	22	0.2	27	0.177632	56	0.227642
	2	83	0.163386	54	0.158358	24	0.164384	5	0.238095	20	0.176991	17	0.123188	29	0.223077	8	0.103896	9	0.18	10	0.126582	1	0.0526316	4	0.16	3	0.1875	65	0.176152	0	0	1	0.2	10	0.15873	12	0.2	60	0.163043	20	0.181818	23	0.151316	40	0.162602
	3	205	0.403543	146	0.428152	51	0.349315	8	0.380952	54	0.477876	50	0.362319	51	0.392308	31	0.402597	19	0.38	32	0.405063	7	0.368421	13	0.52	5	0.3125	148	0.401084	5	0.416667	1	0.2	24	0.380952	22	0.366667	153	0.415761	38	0.345455	66	0.434211	101	0.410569
	4	64	0.125984	42	0.123167	21	0.143836	1	0.047619	9	0.079646	26	0.188406	17	0.130769	7	0.0909091	5	0.1	9	0.113924	4	0.210526	1	0.04	1	0.0625	49	0.132791	0	0	1	0.2	6	0.0952381	6	0.1	51	0.138587	16	0.145455	22	0.144737	26	0.105691
	5 - I totally agree	51	0.100394	35	0.102639	13	0.0890411	3	0.142857	12	0.106195	15	0.108696	7	0.0538462	7	0.0909091	10	0.2	10	0.126582	4	0.210526	2	0.08	2	0.125	33	0.0894309	5	0.416667	2	0.4	11	0.174603	8	0.133333	25	0.0679348	14	0.127273	14	0.0921053	23	0.0934959
	All	508	1	341	1	146	1	21	1	113	1	138	1	130	1	77	1	50	1	79	1	19	1	25	1	16	1	369	1	12	1	5	1	63	1	60	1	368	1	110	1	152	1	246	1
Comparing proportions in columnsb
		All	Sex			Age					Place of residence					Education					How often do you visit municiapl forest?
		All	Female	Male	Sex	18-25	26-35	36-45	46-55	56+	Village	Town with less than 25 000 residents	Town 25 000 -100 000 residents	City with 101 000 - 500 000 residents	City with over 500 000 residents	Elementary	Vocational	Secondary	Students	Higher	Once a week or more often	Once per several weeks/ once a month	Several times a year
		(A)	(A)	(B)	(C)	(A)	(B)	(C)	(D)	(E)	(A)	(B)	(C)	(D)	(E)	(A)	(B)	(C)	(D)	(E)	(A)	(B)	(C)
10. Cutting branches improves the health of even old trees.	1 - I don't agree at all	.															.a
	2	.														.a
	3	.
	4	.														.a
	5 - I totally agree	.								C						E	E	E
Results are based on two-tailed tests with a significance level of 0.05. For each significant pair, the category with the smaller column proportion appears below the category with the greater proportion in the columns.
a. This category was not used in the comparisons because its column ratio is zero or one. b. Tests are adjusted for all pairwise comparisons within each inner subtable using the Bonferroni correction.
		Overall		Sex						Age										Place of residence										Education										How often do you visit municiapl forest?
		Overall		Female		Male		Other		18-25		26-35		36-45		46-55		56+		Village		Town with less than 25 000 residents		Town 25 000 -100 000 residents		City with 101 000 - 500 000 residents		City with over 500 000 residents		Elemetary		Vocational		Secondary		Students		Higher		Once a week or more often		Once per several weeks/ once a month		Several times a year
		Number	% of N in the column	Number	% of N in the column	Number	% of N in the column	Number	% of N in the column	Number	% of N in the column	Number	% of N in the column	Number	% of N in the column	Number	% of N in the column	Number	% of N in the column	Number	% of N in the column	Number	% of N in the column	Number	% of N in the column	Number	% of N in the column	Number	% of N in the column	Number	% of N in the column	Number	% of N in the column	Number	% of N in the column	Number	% of N in the column	Number	% of N in the column	Number	% of N in the column	Number	% of N in the column	Number	% of N in the column
11. There are many methods to determine the actual health of very old trees.	1 - I don't agree at all	6	0.011811	3	0.00879765	2	0.0136986	1	0.047619	2	0.0176991	0	0	1	0.00769231	3	0.038961	0	0	1	0.0126582	0	0	0	0	2	0.125	3	0.00813008	1	0.0833333	0	0	1	0.015873	1	0.0166667	3	0.00815217	2	0.0181818	1	0.00657895	3	0.0121951
	2	6	0.011811	3	0.00879765	2	0.0136986	1	0.047619	3	0.0265487	2	0.0144928	0	0	1	0.012987	0	0	2	0.0253165	0	0	1	0.04	0	0	3	0.00813008	0	0	0	0	0	0	3	0.05	3	0.00815217	1	0.00909091	1	0.00657895	4	0.0162602
	3	95	0.187008	60	0.175953	33	0.226027	2	0.0952381	26	0.230088	30	0.217391	21	0.161538	12	0.155844	6	0.12	13	0.164557	2	0.105263	2	0.08	4	0.25	74	0.200542	4	0.333333	1	0.2	10	0.15873	14	0.233333	66	0.179348	17	0.154545	27	0.177632	51	0.207317
	4	127	0.25	91	0.266862	33	0.226027	3	0.142857	31	0.274336	44	0.318841	32	0.246154	10	0.12987	10	0.2	16	0.202532	7	0.368421	3	0.12	3	0.1875	98	0.265583	1	0.0833333	0	0	19	0.301587	16	0.266667	91	0.247283	28	0.254545	49	0.322368	50	0.203252
	5 - I totally agree	274	0.53937	184	0.539589	76	0.520548	14	0.666667	51	0.451327	62	0.449275	76	0.584615	51	0.662338	34	0.68	47	0.594937	10	0.526316	19	0.76	7	0.4375	191	0.517615	6	0.5	4	0.8	33	0.52381	26	0.433333	205	0.557065	62	0.563636	74	0.486842	138	0.560976
	All	508	1	341	1	146	1	21	1	113	1	138	1	130	1	77	1	50	1	79	1	19	1	25	1	16	1	369	1	12	1	5	1	63	1	60	1	368	1	110	1	152	1	246	1
Comparing proportions in columnsb
		All	Sex			Age					Place of residence					Education					How often do you visit municiapl forest?
		All	Female	Male	Sex	18-25	26-35	36-45	46-55	56+	Village	Town with less than 25 000 residents	Town 25 000 -100 000 residents	City with 101 000 - 500 000 residents	City with over 500 000 residents	Elementary	Vocational	Secondary	Students	Higher	Once a week or more often	Once per several weeks/ once a month	Several times a year
		(A)	(A)	(B)	(C)	(A)	(B)	(C)	(D)	(E)	(A)	(B)	(C)	(D)	(E)	(A)	(B)	(C)	(D)	(E)	(A)	(B)	(C)
11. There are many methods to determine the actual health of very old trees.	1 - I don't agree at all	.					.a			.a		.a	.a	E			.a
	2	.						.a		.a		.a		.a		.a	.a	.a	E
	3	.
	4	.					D										.a					C
	5 - I totally agree	.							A B
Results are based on two-tailed tests with a significance level of 0.05. For each significant pair, the category with the smaller column proportion appears below the category with the greater proportion in the columns.
a. This category was not used in the comparisons because its column ratio is zero or one. b. Tests are adjusted for all pairwise comparisons within each inner subtable using the Bonferroni correction.
	All	Sex			Age					Place of residence					Education					How often do you visit municiapl forest?
	All	Female	Male	Other	18-25	26-35	36-45	46-55	56+	Village	Town with less than 25 000 residents	Town 25 000 -100 000 residents	City with 101 000 - 500 000 residents	City with over 500 000 residents	Elementary	Vocational	Secondary	Students	Higher	Once a week or more often	Once per several weeks/ once a month	Several times a year
	Średnia	Average	Average	Average	Average	Average	Average	Average	Average	Average	Average	Average	Average	Average	Average	Average	Average	Average	Average	Average	Average	Average
1. Old trees in themunicipal forest pose a potential threat to the safety of visitors.	1.84252	1.84751	1.86986	1.57143	2.12389	1.94928	1.71538	1.57143	1.66	2.12658	1.84211	1.6	2.125	1.78591	2.66667	2	1.7619	1.91667	1.81522	1.73636	1.80263	1.91463
2. Old trees are more valuable to the environment than younger trees.	4.18307	4.19062	4.15753	4.2381	4	4.00725	4.24615	4.45455	4.5	4.25316	4.42105	4.16	4.1875	4.15718	4.25	4.4	4.09524	4.11667	4.2038	4.29091	4.05921	4.21138
3. It is better to replace an old tree with a younger one.	1.6063	1.61877	1.59589	1.47619	1.76991	1.71014	1.50769	1.36364	1.58	1.83544	1.52632	1.68	1.375	1.5664	1.83333	1	1.55556	1.61667	1.61413	1.54545	1.61184	1.63008
4. Fruiting bodies of fungi on the trunk or branches do not mean a death sentence for the tree on which they grow.	3.91732	3.96774	3.76712	4.14286	3.78761	4.04348	3.87692	3.8961	4	3.78481	3.94737	4.04	3.5	3.95393	4.16667	4.4	3.53968	4	3.9538	3.97273	3.92763	3.88618
5. Hollow trees pose a greater threat than trees without hollows.	2.06693	2.0176	2.24658	1.61905	2.34513	2.15942	2	1.84416	1.7	2.1519	1.84211	2.24	2.5	2.02981	1.91667	2.8	2.01587	2.36667	2.02174	1.90909	2.04605	2.15041
6. Decayed trees inside must be cut down immediately.	2.42126	2.44282	2.38356	2.33333	2.75221	2.51449	2.15385	2.18182	2.48	2.59494	2.47368	2.24	2.3125	2.39837	2.58333	2.8	2.57143	2.61667	2.35326	2.29091	2.57895	2.38211
7. Old trees increase the attractiveness of municipal forests.	4.77953	4.79472	4.73973	4.80952	4.66372	4.76087	4.81538	4.81818	4.94	4.75949	4.63158	4.92	4.625	4.78862	4.66667	5	4.57143	4.85	4.80435	4.80909	4.80921	4.74797
8. Dying trees should be cut down even if they are natural monuments.	1.72441	1.71261	1.76027	1.66667	1.95575	1.80435	1.52308	1.54545	1.78	1.81013	1.84211	1.56	1.75	1.71003	2.33333	1.4	1.74603	1.91667	1.67391	1.61818	1.81579	1.71545
9. Trees in municipal forests should undergo the same care as street trees.	2.15354	2.20235	2.05479	2.04762	2.33628	2.15942	2.00769	1.90909	2.48	2.27848	2.26316	2.2	2.0625	2.12195	3.25	2.6	2.55556	2.31667	2.0163	1.86364	2.33553	2.17073
10. Cutting branches improves the health of even old trees.	2.75	2.79472	2.65068	2.71429	2.79646	2.84783	2.61538	2.54545	3.04	2.78481	3.26316	2.64	2.5	2.73442	3.5	3.8	2.90476	2.76667	2.68207	2.81818	2.82237	2.6748
11. There are many methods to determine the actual health of very old trees.	4.29331	4.31965	4.22603	4.33333	4.11504	4.2029	4.4	4.36364	4.56	4.34177	4.42105	4.6	3.8125	4.27642	3.91667	4.6	4.31746	4.05	4.33696	4.33636	4.27632	4.28455
Comparing proportions in columns
	All	Sex			Age					Place of residence					Education					How often do you visit municiapl forest?
	All	Female	Male	Other	18-25	26-35	36-45	46-55	56+	Village	Town with less than 25 000 residents	Town 25 000 -100 000 residents	City with 101 000 - 500 000 residents	City with over 500 000 residents	Elementary	Vocational	Secondary	Students	Higher	Once a week or more often	Once per several weeks/ once a month	Several times a year
	(A)	(A)	(B)	(C)	(A)	(B)	(C)	(D)	(E)	(A)	(B)	(C)	(D)	(E)	(A)	(B)	(C)	(D)	(E)	(A)	(B)	(C)
1. Old trees in themunicipal forest pose a potential threat to the safety of visitors.	.				C D E	D				C E					C D E
2. Old trees are more valuable to the environment than younger trees.	.						A B	A B	A B
3. It is better to replace an old tree with a younger one.	.				C D	D				E
4. Fruiting bodies of fungi on the trunk or branches do not mean a death sentence for the tree on which they grow.	.																	C	C
5. Hollow trees pose a greater threat than trees without hollows.	.		C		C D E	E												E
6. Decayed trees inside must be cut down immediately.	.				C D	C
7. Old trees increase the attractiveness of municipal forests.	.								A									C	C
8. Dying trees should be cut down even if they are natural monuments.	.				C D	C									E
9. Trees in municipal forests should undergo the same care as street trees.	.				D				C D						D E		E				A	A
10. Cutting branches improves the health of even old trees.	.								C D						E	E
11. There are many methods to determine the actual health of very old trees.	.						A		A B	D	D	D		D					D
Results are based on two-tailed tests with a significance level of 0.05. For each significant pair, the category with the smaller column proportion appears below the category with the greater proportion in the columns.
		Overall		Sex						Age										Place of residence										Education										How often do you visit municiapl forest?
		Overall		Female		Male		Other		18-25		26-35		36-45		46-55		56+		Village		Town with less than 25 000 residents		Town 25 000 -100 000 residents		City with 101 000 - 500 000 residents		City with over 500 000 residents		Elemetary		Vocational		Secondary		Students		Higher		Once a week or more often		Once per several weeks/ once a month		Several times a year
		Number	% of N in the column	Number	% of N in the column	Number	% of N in the column	Number	% of N in the column	Number	% of N in the column	Number	% of N in the column	Number	% of N in the column	Number	% of N in the column	Number	% of N in the column	Number	% of N in the column	Number	% of N in the column	Number	% of N in the column	Number	% of N in the column	Number	% of N in the column	Number	% of N in the column	Number	% of N in the column	Number	% of N in the column	Number	% of N in the column	Number	% of N in the column	Number	% of N in the column	Number	% of N in the column	Number	% of N in the column
Średnia czynnik 1	1,00	76	0.149606	53	0.155425	19	0.130137	4	0.190476	10	0.0884956	10	0.0724638	24	0.184615	21	0.272727	11	0.22	13	0.164557	4	0.210526	5	0.2	1	0.0625	53	0.143631	1	0.0833333	0	0	8	0.126984	6	0.1	61	0.165761	19	0.172727	20	0.131579	37	0.150407
	1,20	51	0.100394	28	0.0821114	20	0.136986	3	0.142857	5	0.0442478	15	0.108696	16	0.123077	11	0.142857	4	0.08	3	0.0379747	3	0.157895	4	0.16	1	0.0625	40	0.108401	0	0	1	0.2	5	0.0793651	2	0.0333333	43	0.116848	10	0.0909091	18	0.118421	23	0.0934959
	1,40	39	0.0767717	27	0.0791789	12	0.0821918	0	0	1	0.00884956	17	0.123188	11	0.0846154	5	0.0649351	5	0.1	7	0.0886076	1	0.0526316	2	0.08	1	0.0625	28	0.0758808	0	0	0	0	6	0.0952381	2	0.0333333	31	0.0842391	9	0.0818182	10	0.0657895	20	0.0813008
	1,60	57	0.112205	38	0.111437	15	0.10274	4	0.190476	11	0.0973451	15	0.108696	20	0.153846	7	0.0909091	4	0.08	5	0.0632911	1	0.0526316	0	0	1	0.0625	50	0.135501	1	0.0833333	0	0	6	0.0952381	6	0.1	44	0.119565	16	0.145455	21	0.138158	20	0.0813008
	1,80	59	0.116142	40	0.117302	15	0.10274	4	0.190476	9	0.079646	17	0.123188	16	0.123077	9	0.116883	8	0.16	5	0.0632911	2	0.105263	3	0.12	5	0.3125	44	0.119241	0	0	1	0.2	10	0.15873	9	0.15	39	0.105978	19	0.172727	13	0.0855263	27	0.109756
	2,00	47	0.0925197	37	0.108504	10	0.0684932	0	0	18	0.159292	11	0.0797101	11	0.0846154	6	0.0779221	1	0.02	9	0.113924	2	0.105263	3	0.12	1	0.0625	32	0.0867209	3	0.25	0	0	4	0.0634921	9	0.15	31	0.0842391	8	0.0727273	10	0.0657895	29	0.117886
	2,20	40	0.0787402	29	0.085044	10	0.0684932	1	0.047619	15	0.132743	14	0.101449	6	0.0461538	2	0.025974	3	0.06	8	0.101266	1	0.0526316	2	0.08	3	0.1875	26	0.0704607	2	0.166667	2	0.4	7	0.111111	8	0.133333	21	0.0570652	6	0.0545455	9	0.0592105	25	0.101626
	2,40	30	0.0590551	21	0.0615836	7	0.0479452	2	0.0952381	11	0.0973451	6	0.0434783	4	0.0307692	5	0.0649351	4	0.08	7	0.0886076	1	0.0526316	0	0	1	0.0625	21	0.0569106	2	0.166667	0	0	3	0.047619	5	0.0833333	20	0.0543478	4	0.0363636	13	0.0855263	13	0.0528455
	2,60	26	0.0511811	17	0.0498534	7	0.0479452	2	0.0952381	8	0.0707965	7	0.0507246	5	0.0384615	3	0.038961	3	0.06	3	0.0379747	1	0.0526316	1	0.04	0	0	21	0.0569106	0	0	1	0.2	4	0.0634921	2	0.0333333	19	0.0516304	6	0.0545455	10	0.0657895	10	0.0406504
	2,80	20	0.0393701	13	0.0381232	7	0.0479452	0	0	7	0.0619469	5	0.0362319	5	0.0384615	2	0.025974	1	0.02	3	0.0379747	0	0	1	0.04	1	0.0625	15	0.0406504	0	0	0	0	5	0.0793651	3	0.05	12	0.0326087	6	0.0545455	5	0.0328947	9	0.0365854
	3,00	20	0.0393701	13	0.0381232	6	0.0410959	1	0.047619	8	0.0707965	3	0.0217391	5	0.0384615	1	0.012987	3	0.06	4	0.0506329	1	0.0526316	2	0.08	0	0	13	0.0352304	2	0.166667	0	0	1	0.015873	3	0.05	14	0.0380435	2	0.0181818	9	0.0592105	9	0.0365854
	3,20	11	0.0216535	6	0.0175953	5	0.0342466	0	0	3	0.0265487	4	0.0289855	2	0.0153846	2	0.025974	0	0	3	0.0379747	1	0.0526316	1	0.04	0	0	6	0.0162602	0	0	0	0	1	0.015873	1	0.0166667	9	0.0244565	0	0	4	0.0263158	7	0.0284553
	3,40	11	0.0216535	4	0.0117302	7	0.0479452	0	0	3	0.0265487	3	0.0217391	1	0.00769231	2	0.025974	2	0.04	4	0.0506329	0	0	0	0	0	0	7	0.0189702	1	0.0833333	0	0	2	0.031746	1	0.0166667	7	0.0190217	1	0.00909091	5	0.0328947	5	0.0203252
	3,60	8	0.015748	5	0.0146628	3	0.0205479	0	0	1	0.00884956	4	0.0289855	3	0.0230769	0	0	0	0	2	0.0253165	0	0	1	0.04	0	0	5	0.0135501	0	0	0	0	1	0.015873	2	0.0333333	5	0.013587	1	0.00909091	2	0.0131579	5	0.0203252
	3,80	6	0.011811	4	0.0117302	2	0.0136986	0	0	1	0.00884956	4	0.0289855	0	0	0	0	1	0.02	2	0.0253165	0	0	0	0	0	0	4	0.0108401	0	0	0	0	0	0	0	0	6	0.0163043	1	0.00909091	1	0.00657895	4	0.0162602
	4,00	1	0.0019685	1	0.00293255	0	0	0	0	0	0	1	0.00724638	0	0	0	0	0	0	0	0	0	0	0	0	0	0	1	0.00271003	0	0	0	0	0	0	0	0	1	0.00271739	0	0	1	0.00657895	0	0
	4,20	3	0.00590551	2	0.0058651	1	0.00684932	0	0	1	0.00884956	2	0.0144928	0	0	0	0	0	0	1	0.0126582	0	0	0	0	1	0.0625	1	0.00271003	0	0	0	0	0	0	1	0.0166667	2	0.00543478	1	0.00909091	1	0.00657895	1	0.00406504
	4,40	1	0.0019685	1	0.00293255	0	0	0	0	0	0	0	0	0	0	1	0.012987	0	0	0	0	0	0	0	0	0	0	1	0.00271003	0	0	0	0	0	0	0	0	1	0.00271739	0	0	0	0	1	0.00406504
	4,60	1	0.0019685	1	0.00293255	0	0	0	0	0	0	0	0	1	0.00769231	0	0	0	0	0	0	1	0.0526316	0	0	0	0	0	0	0	0	0	0	0	0	0	0	1	0.00271739	1	0.00909091	0	0	0	0
	5,00	1	0.0019685	1	0.00293255	0	0	0	0	1	0.00884956	0	0	0	0	0	0	0	0	0	0	0	0	0	0	0	0	1	0.00271003	0	0	0	0	0	0	0	0	1	0.00271739	0	0	0	0	1	0.00406504
	Ogółem	508	1	341	1	146	1	21	1	113	1	138	1	130	1	77	1	50	1	79	1	19	1	25	1	16	1	369	1	12	1	5	1	63	1	60	1	368	1	110	1	152	1	246	1
Comparing proportions in columnsb
		All	Sex			Age					Place of residence					Education					How often do you visit municiapl forest?
		All	Female	Male	Other	18-25	26-35	36-45	46-55	56+	Village	Town with less than 25 000 residents	Town 25 000 -100 000 residents	City with 101 000 - 500 000 residents	City with over 500 000 residents	Elementary	Vocational	Secondary	Students	Higher	Once a week or more often	Once per several weeks/ once a month	Several times a year
		(A)	(A)	(B)	(C)	(A)	(B)	(C)	(D)	(E)	(A)	(B)	(C)	(D)	(E)	(A)	(B)	(C)	(D)	(E)	(A)	(B)	(C)
Average factor 1	1,00	.							A B	B							.a
	1,20	.														.a
	1,40	.			.a		A			A						.a	.a
	1,60	.											.a				.a
	1,80	.												A		.a
	2,00	.			.a												.a
	2,20	.															E
	2,40	.											.a				.a
	2,60	.												.a		.a
	2,80	.			.a							.a				.a	.a
	3,00	.												.a			.a
	3,20	.			.a					.a				.a		.a	.a				.a
	3,40	.		A	.a							.a	.a	.a			.a
	3,60	.			.a				.a	.a		.a		.a		.a	.a
	3,80	.			.a			.a	.a			.a	.a	.a		.a	.a	.a	.a
	4,00	.		.a	.a	.a		.a	.a	.a	.a	.a	.a	.a		.a	.a	.a	.a		.a		.a
	4,20	.			.a			.a	.a	.a		.a	.a	E		.a	.a	.a
	4,40	.		.a	.a	.a	.a	.a		.a	.a	.a	.a	.a		.a	.a	.a	.a		.a	.a
	4,60	.		.a	.a	.a	.a		.a	.a	.a		.a	.a	.a	.a	.a	.a	.a			.a	.a
	5,00	.		.a	.a		.a	.a	.a	.a	.a	.a	.a	.a		.a	.a	.a	.a		.a	.a
Results are based on two-tailed tests with a significance level of 0.05. For each significant pair, the category with the smaller column proportion appears below the category with the greater proportion in the columns.
a. This category was not used in the comparisons because its column ratio is zero or one. b. Tests are adjusted for all pairwise comparisons within each inner subtable using the Bonferroni correction.
		Overall		Sex						Age										Place of residence										Education										How often do you visit municiapl forest?
		Overall		Female		Male		Other		18-25		26-35		36-45		46-55		56+		Village		Town with less than 25 000 residents		Town 25 000 -100 000 residents		City with 101 000 - 500 000 residents		City with over 500 000 residents		Elemetary		Vocational		Secondary		Students		Higher		Once a week or more often		Once per several weeks/ once a month		Several times a year
		Number	% of N in the column	Number	% of N in the column	Number	% of N in the column	Number	% of N in the column	Number	% of N in the column	Number	% of N in the column	Number	% of N in the column	Number	% of N in the column	Number	% of N in the column	Number	% of N in the column	Number	% of N in the column	Number	% of N in the column	Number	% of N in the column	Number	% of N in the column	Number	% of N in the column	Number	% of N in the column	Number	% of N in the column	Number	% of N in the column	Number	% of N in the column	Number	% of N in the column	Number	% of N in the column	Number	% of N in the column
" Average factor 1" " Average factor 1" Average factor 2	2,00	2	0.00393701	1	0.00293255	1	0.00684932	0	0	1	0.00884956	0	0	0	0	1	0.012987	0	0	0	0	0	0	0	0	1	0.0625	1	0.00271003	1	0.0833333	0	0	1	0.015873	0	0	0	0	0	0	0	0	2	0.00813008
	2,50	2	0.00393701	1	0.00293255	1	0.00684932	0	0	0	0	0	0	0	0	2	0.025974	0	0	0	0	1	0.0526316	0	0	0	0	1	0.00271003	0	0	0	0	0	0	0	0	2	0.00543478	1	0.00909091	0	0	1	0.00406504
	2,75	6	0.011811	4	0.0117302	1	0.00684932	1	0.047619	3	0.0265487	2	0.0144928	1	0.00769231	0	0	0	0	2	0.0253165	0	0	1	0.04	1	0.0625	2	0.00542005	0	0	0	0	0	0	2	0.0333333	4	0.0108696	0	0	3	0.0197368	3	0.0121951
	3,00	6	0.011811	3	0.00879765	3	0.0205479	0	0	4	0.0353982	1	0.00724638	1	0.00769231	0	0	0	0	1	0.0126582	0	0	0	0	0	0	5	0.0135501	0	0	0	0	2	0.031746	0	0	4	0.0108696	0	0	1	0.00657895	5	0.0203252
	3,25	21	0.0413386	13	0.0381232	8	0.0547945	0	0	6	0.0530973	9	0.0652174	3	0.0230769	2	0.025974	1	0.02	5	0.0632911	0	0	1	0.04	0	0	15	0.0406504	1	0.0833333	0	0	4	0.0634921	2	0.0333333	14	0.0380435	3	0.0272727	8	0.0526316	10	0.0406504
	3,50	44	0.0866142	31	0.0909091	13	0.0890411	0	0	9	0.079646	13	0.0942029	14	0.107692	5	0.0649351	3	0.06	5	0.0632911	1	0.0526316	2	0.08	1	0.0625	35	0.0948509	0	0	1	0.2	7	0.111111	4	0.0666667	32	0.0869565	8	0.0727273	13	0.0855263	23	0.0934959
	3,75	36	0.0708661	27	0.0791789	8	0.0547945	1	0.047619	8	0.0707965	10	0.0724638	10	0.0769231	6	0.0779221	2	0.04	6	0.0759494	0	0	1	0.04	2	0.125	27	0.0731707	0	0	0	0	6	0.0952381	5	0.0833333	25	0.0679348	9	0.0818182	10	0.0657895	17	0.0691057
	4,00	68	0.133858	38	0.111437	26	0.178082	4	0.190476	16	0.141593	22	0.15942	17	0.130769	8	0.103896	5	0.1	11	0.139241	2	0.105263	2	0.08	3	0.1875	50	0.135501	1	0.0833333	0	0	10	0.15873	9	0.15	48	0.130435	19	0.172727	23	0.151316	26	0.105691
	4,25	62	0.122047	44	0.129032	15	0.10274	3	0.142857	21	0.185841	15	0.108696	14	0.107692	4	0.0519481	8	0.16	15	0.189873	2	0.105263	1	0.04	2	0.125	42	0.113821	2	0.166667	0	0	7	0.111111	12	0.2	41	0.111413	6	0.0545455	22	0.144737	34	0.138211
	4,50	83	0.163386	49	0.143695	30	0.205479	4	0.190476	20	0.176991	22	0.15942	21	0.161538	15	0.194805	5	0.1	3	0.0379747	8	0.421053	3	0.12	3	0.1875	66	0.178862	2	0.166667	0	0	12	0.190476	10	0.166667	59	0.160326	24	0.218182	24	0.157895	35	0.142276
	4,75	75	0.147638	54	0.158358	16	0.109589	5	0.238095	14	0.123894	18	0.130435	22	0.169231	10	0.12987	11	0.22	10	0.126582	3	0.157895	7	0.28	1	0.0625	54	0.146341	3	0.25	2	0.4	6	0.0952381	6	0.1	58	0.157609	19	0.172727	20	0.131579	36	0.146341
	5,00	103	0.202756	76	0.222874	24	0.164384	3	0.142857	11	0.0973451	26	0.188406	27	0.207692	24	0.311688	15	0.3	21	0.265823	2	0.105263	7	0.28	2	0.125	71	0.192412	2	0.166667	2	0.4	8	0.126984	10	0.166667	81	0.220109	21	0.190909	28	0.184211	54	0.219512
	Ogółem	508	1	341	1	146	1	21	1	113	1	138	1	130	1	77	1	50	1	79	1	19	1	25	1	16	1	369	1	12	1	5	1	63	1	60	1	368	1	110	1	152	1	246	1
Comparing proportions in columnsb
		All	Sex			Age					Place of residence					Education					How often do you visit municiapl forest?
		All	Female	Male	Other	18-25	26-35	36-45	46-55	56+	Village	Town with less than 25 000 residents	Town 25 000 -100 000 residents	City with 101 000 - 500 000 residents	City with over 500 000 residents	Elementary	Vocational	Secondary	Students	Higher	Once a week or more often	Once per several weeks/ once a month	Several times a year
		(A)	(A)	(B)	(C)	(A)	(B)	(C)	(D)	(E)	(A)	(B)	(C)	(D)	(E)	(A)	(B)	(C)	(D)	(E)	(A)	(B)	(C)
Average factor 2	2,00	.			.a		.a	.a		.a	.a	.a	.a	E			.a		.a	.a	.a	.a
	2,50	.			.a	.a	.a	.a		.a	.a	E	.a	.a		.a	.a	.a	.a			.a
	2,75	.							.a	.a		.a				.a	.a	.a			.a
	3,00	.			.a				.a	.a		.a	.a	.a		.a	.a		.a		.a
	3,25	.			.a							.a		.a			.a
	3,50	.			.a											.a
	3,75	.										.a				.a	.a
	4,00	.															.a
	4,25	.															.a
	4,50	.										A			A		.a
	4,75	.
	5,00	.							A	A
Results are based on two-tailed tests with a significance level of 0.05. For each significant pair, the category with the smaller column proportion appears below the category with the greater proportion in the columns.
a. This category was not used in the comparisons because its column ratio is zero or one. b. Tests are adjusted for all pairwise comparisons within each inner subtable using the Bonferroni correction.
		Overall		Sex						Age										Place of residence										Education										How often do you visit municiapl forest?
		Overall		Female		Male		Other		18-25		26-35		36-45		46-55		56+		Village		Town with less than 25 000 residents		Town 25 000 -100 000 residents		City with 101 000 - 500 000 residents		City with over 500 000 residents		Elemetary		Vocational		Secondary		Students		Higher		Once a week or more often		Once per several weeks/ once a month		Several times a year
		Number	% of N in the column	Number	% of N in the column	Number	% of N in the column	Number	% of N in the column	Number	% of N in the column	Number	% of N in the column	Number	% of N in the column	Number	% of N in the column	Number	% of N in the column	Number	% of N in the column	Number	% of N in the column	Number	% of N in the column	Number	% of N in the column	Number	% of N in the column	Number	% of N in the column	Number	% of N in the column	Number	% of N in the column	Number	% of N in the column	Number	% of N in the column	Number	% of N in the column	Number	% of N in the column	Number	% of N in the column
Average factor 3	1,00	86	0.169291	54	0.158358	29	0.19863	3	0.142857	11	0.0973451	25	0.181159	22	0.169231	21	0.272727	7	0.14	15	0.189873	3	0.157895	3	0.12	4	0.25	61	0.165312	1	0.0833333	0	0	9	0.142857	9	0.15	67	0.182065	20	0.181818	19	0.125	47	0.191057
	1,50	54	0.106299	31	0.0909091	18	0.123288	5	0.238095	12	0.106195	9	0.0652174	20	0.153846	7	0.0909091	6	0.12	4	0.0506329	1	0.0526316	4	0.16	2	0.125	43	0.116531	0	0	1	0.2	7	0.111111	5	0.0833333	41	0.111413	17	0.154545	13	0.0855263	24	0.097561
	2,00	111	0.218504	82	0.240469	28	0.191781	1	0.047619	24	0.212389	27	0.195652	33	0.253846	18	0.233766	9	0.18	16	0.202532	1	0.0526316	4	0.16	3	0.1875	87	0.235772	2	0.166667	1	0.2	10	0.15873	13	0.216667	85	0.230978	29	0.263636	31	0.203947	51	0.207317
	2,50	73	0.143701	47	0.13783	21	0.143836	5	0.238095	19	0.168142	23	0.166667	19	0.146154	9	0.116883	3	0.06	8	0.101266	5	0.263158	7	0.28	2	0.125	51	0.138211	1	0.0833333	1	0.2	6	0.0952381	10	0.166667	55	0.149457	13	0.118182	28	0.184211	32	0.130081
	3,00	75	0.147638	47	0.13783	23	0.157534	5	0.238095	25	0.221239	23	0.166667	10	0.0769231	8	0.103896	9	0.18	19	0.240506	4	0.210526	3	0.12	2	0.125	47	0.127371	2	0.166667	0	0	10	0.15873	10	0.166667	53	0.144022	10	0.0909091	23	0.151316	42	0.170732
	3,50	37	0.0728346	26	0.0762463	11	0.0753425	0	0	7	0.0619469	11	0.0797101	11	0.0846154	5	0.0649351	3	0.06	5	0.0632911	2	0.105263	1	0.04	0	0	29	0.0785908	2	0.166667	0	0	7	0.111111	3	0.05	25	0.0679348	6	0.0545455	14	0.0921053	17	0.0691057
	4,00	32	0.0629921	26	0.0762463	6	0.0410959	0	0	7	0.0619469	8	0.057971	7	0.0538462	4	0.0519481	6	0.12	6	0.0759494	0	0	1	0.04	2	0.125	23	0.0623306	0	0	0	0	7	0.111111	3	0.05	22	0.0597826	3	0.0272727	13	0.0855263	16	0.0650407
	4,50	17	0.0334646	12	0.0351906	5	0.0342466	0	0	4	0.0353982	8	0.057971	3	0.0230769	2	0.025974	0	0	3	0.0379747	1	0.0526316	1	0.04	1	0.0625	11	0.0298103	0	0	0	0	0	0	5	0.0833333	12	0.0326087	3	0.0272727	7	0.0460526	7	0.0284553
	5,00	23	0.0452756	16	0.0469208	5	0.0342466	2	0.0952381	4	0.0353982	4	0.0289855	5	0.0384615	3	0.038961	7	0.14	3	0.0379747	2	0.105263	1	0.04	0	0	17	0.0460705	4	0.333333	2	0.4	7	0.111111	2	0.0333333	8	0.0217391	9	0.0818182	4	0.0263158	10	0.0406504
	Ogółem	508	1	341	1	146	1	21	1	113	1	138	1	130	1	77	1	50	1	79	1	19	1	25	1	16	1	369	1	12	1	5	1	63	1	60	1	368	1	110	1	152	1	246	1
Comparing proportions in columnsb
		All	Sex			Age					Place of residence					Education					How often do you visit municiapl forest?
		All	Female	Male	Other	18-25	26-35	36-45	46-55	56+	Village	Town with less than 25 000 residents	Town 25 000 -100 000 residents	City with 101 000 - 500 000 residents	City with over 500 000 residents	Elementary	Vocational	Secondary	Students	Higher	Once a week or more often	Once per several weeks/ once a month	Several times a year
		(A)	(A)	(B)	(C)	(A)	(B)	(C)	(D)	(E)	(A)	(B)	(C)	(D)	(E)	(A)	(B)	(C)	(D)	(E)	(A)	(B)	(C)
Average factor 3	1,00	.							A								.a
	1,50	.														.a
	2,00	.
	2,50	.
	3,00	.				C											.a
	3,50	.			.a									.a			.a
	4,00	.			.a							.a				.a	.a
	4,50	.			.a					.a						.a	.a	.a
	5,00	.								B				.a		D E	D E	E
Results are based on two-tailed tests with a significance level of 0.05. For each significant pair, the category with the smaller column proportion appears below the category with the greater proportion in the columns.
a. This category was not used in the comparisons because its column ratio is zero or one. b. Tests are adjusted for all pairwise comparisons within each inner subtable using the Bonferroni correction.
	All	Sex			Age					Place of residence					Education					How often do you visit municiapl forest?
	All	Female	Male	Other	18-25	26-35	36-45	46-55	56+	Village	Town with less than 25 000 residents	Town 25 000 -100 000 residents	City with 101 000 - 500 000 residents	City with over 500 000 residents	Elementary	Vocational	Secondary	Students	Higher	Once a week or more often	Once per several weeks/ once a month	Several times a year
	Average	Average	Average	Average	Average	Average	Average	Average	Average	Average	Average	Average	Average	Average	Average	Average	Average	Average	Average	Average	Average	Average
Average factor 1	1.93228	1.92786	1.97123	1.73333	2.18938	2.02754	1.78	1.7013	1.84	2.1038	1.90526	1.864	2.0125	1.8981	2.26667	2	1.93016	2.08667	1.89565	1.82	1.97105	1.95854
Average factor 2	4.29331	4.31818	4.2226	4.38095	4.14159	4.25362	4.33462	4.38312	4.5	4.28481	4.35526	4.43	4.03125	4.29404	4.25	4.6	4.13095	4.25417	4.32473	4.35227	4.26809	4.28252
Average factor 3	2.45177	2.49853	2.35274	2.38095	2.56637	2.50362	2.31154	2.22727	2.76	2.53165	2.76316	2.42	2.28125	2.42818	3.375	3.2	2.73016	2.54167	2.34918	2.34091	2.57895	2.42276
Comparisons of average in columns
	All	Sex			Age					Place of residence					Education					How often do you visit municiapl forest?
	All	Female	Male	Other	18-25	26-35	36-45	46-55	56+	Village	Town with less than 25 000 residents	Town 25 000 -100 000 residents	City with 101 000 - 500 000 residents	City with over 500 000 residents	Elementary	Vocational	Secondary	Students	Higher	Once a week or more often	Once per several weeks/ once a month	Several times a year
	(A)	(A)	(B)	(C)	(A)	(B)	(C)	(D)	(E)	(A)	(B)	(C)	(D)	(E)	(A)	(B)	(C)	(D)	(E)	(A)	(B)	(C)
Average factor 1	.				C D E	C D				E
Average factor 2	.						A	A	A B			D							C
Average factor 3	.				D				C D						D E		E
Results are based on two-tailed tests with a significance level of 0.05. For each significant pair, the category with the smaller column proportion appears below the category with the greater proportion in the columns.
