# Supplementary material for: Old trees are perceived as a valuable element of the municipal forest landscape
Source: PeerJ. 2022 Jan 12;10:e12700. doi: 10.7717/peerj.12700 (PMC8760855; doi:10.7717/peerj.12700)
Supplement: Supplemental Information 3 [file peerj-10-12700-s003.xlsx]

## Sheet: Arkusz1
Czy odwiedzasz lasy miejskie m. st. Warszawy?
		Częstość	Procent	Procent ważnych	Procent skumulowany
Ważne	nie	18	7.82609	7.82609	7.82609
	tak	212	92.1739	92.1739	100
	Ogółem	230	100	100
		Liczebność	% z N w kolumnie
Płeć	Kobieta	150	0.707547
	Mężczyzna	62	0.292453
Wiek	18-25	41	0.193396
	26-35	73	0.34434
	36-45	60	0.283019
	46-55	23	0.108491
	>56	15	0.0707547
Miejsce zamieszkania	Wieś	27	0.127358
	Miasto poniżej 25 tys. mieszkańców	3	0.0141509
	Miasto 25-100 tys. mieszkańców	8	0.0377358
	Miasto 101-500 tys. mieszkańców	5	0.0235849
	Miasto powyżej 500 tys. mieszkańców	169	0.79717
Wykształcenie	Podstawowe	1	0.00471698
	Zawodowe	1	0.00471698
	Średnie	30	0.141509
	W trakcie studiów	23	0.108491
	Wyższe	157	0.740566
Jak często odwiedzasz lasy miejskie m. st. Warszawy?	Codziennie	2	0.00943396			Codziennie	0.00943396
	Kilka razy w tygodniu	8	0.0377358			Kilka razy w tygodniu	0.0377358
	Raz w tygodniu	40	0.188679			Raz w tygodniu	0.188679
	Raz na kilka tygodni	35	0.165094			Raz na kilka tygodni	0.165094
	Raz w miesiącu	40	0.188679			Raz w miesiącu	0.188679
	Kilka razy w roku	87	0.410377			Kilka razy w roku	0.410377
Wartość testowana
	Płeć	Wiek	Miejsce zamieszkania	Wykształcenie
Chi-kwadrat	36.528	56.019	481.113	403.094
df	1	4	4	4
Istotność asymptotyczna	1.50466e-09	1.98699e-11	8.13979e-103	5.96626e-86
a. 0 komórek (0.0%) ma częstość oczekiwaną mniejszą od 5. Minimalna oczekiwana częstość w komórce wynosi 106.0.
b. 0 komórek (0.0%) ma częstość oczekiwaną mniejszą od 5. Minimalna oczekiwana częstość w komórce wynosi 42.4.
		Liczebność	% z N w kolumnie						% z N w kolumnie
$p2	Ogółem	212						Las Bielański	0.523585
	Barciucha Anin	1	0.00471698					Las Kabacki	0.471698
	Chojnowski Park Krajobrazowy	1	0.00471698					Las Młociński	0.311321
	Kampinoski Park Narodowy	6	0.0283019					Las Bemowski	0.235849
	Las Bemowski	50	0.235849					Las na Kole	0.117925
	Las Bielański	111	0.523585					Las Bródno	0.0849057
	Las Bródno	18	0.0849057					Park Olszyna	0.0849057
	Las Kabacki	100	0.471698					Olszynka Grochowska	0.0471698
	Las Lindego	7	0.0330189					Las Lindego	0.0330189
	Las Młochowski	1	0.00471698					Las Sobieskiego	0.0330189
	Las Młociński	66	0.311321					Kampinoski Park Narodowy	0.0283019
	Las na Kole	25	0.117925					Lasy w Międzylesiu	0.00943396
	Las Sobieskiego	7	0.0330189					Barciucha Anin	0.00471698
	Las w Choszczówce	1	0.00471698					Chojnowski Park Krajobrazowy	0.00471698
	Las w Starej Miłosnej	1	0.00471698					Las Młochowski	0.00471698
	Las Winnica	1	0.00471698					Las w Choszczówce	0.00471698
	Lasy podmiejskie koło Otwocka i Celestynowa	1	0.00471698					Las w Starej Miłosnej	0.00471698
	Lasy Sękocińskie	1	0.00471698					Las Winnica	0.00471698
	Lasy w Międzylesiu	2	0.00943396					Lasy podmiejskie koło Otwocka i Celestynowa	0.00471698
	lasy wawerskie	1	0.00471698					Lasy Sękocińskie	0.00471698
	Łazienki Królewskie	1	0.00471698					lasy wawerskie	0.00471698
	Olszynka Grochowska	10	0.0471698					Łazienki Królewskie	0.00471698
	Park Olszyna	18	0.0849057					Rezerwat Skarpa Ursynowska	0.00471698
	Rezerwat Skarpa Ursynowska	1	0.00471698					Stare cmentarze warszawskie	0.00471698
	Stare cmentarze warszawskie	1	0.00471698					Szczęśliwice	0.00471698
	Szczęśliwice	1	0.00471698					Wiśniowa Góra	0.00471698
	Wiśniowa Góra	1	0.00471698					Zalesione części Białołęki	0.00471698
	Zalesione części Białołęki	1	0.00471698
$p3	Ogółem	212							% z N w kolumnie
	Bliskość	2	0.00943396					Kontakt z przyrodą	0.915094
	Cisza	3	0.0141509					Piękne krajobrazy	0.641509
	Szlaki rowerowe	2	0.00943396					Wygodne szlaki piesze	0.59434
	Kontakt z przyrodą	194	0.915094					Możliwość uprawiania sportów	0.273585
	Place zabaw	28	0.132075					Polany piknikowe	0.216981
	Piękne krajobrazy	136	0.641509					Place zabaw	0.132075
	Mozliwosc spacerowania z psem	1	0.00471698					Cisza	0.0141509
	Możliwość uprawiania sportów	58	0.273585					Bliskość	0.00943396
	Polany piknikowe	46	0.216981					Szlaki rowerowe	0.00943396
	Spokój i przestrzeń	1	0.00471698					Mozliwosc spacerowania z psem	0.00471698
	Wygodne szlaki piesze	126	0.59434					Spokój i przestrzeń	0.00471698

## Sheet: Arkusz2
	Average		1.00	2.00	3.00	4.00	5.00				1.00	2.00	3.00	4.00	5.00
Old trees in themunicipal forest pose a potential threat to the safety of visitors.	1.85377	Old trees in themunicipal forest pose a potential threat to the safety of visitors.	0.490566	0.278302	0.136792	0.0754717	0.0188679	0.01		The only way to ensure the safety of walkers is to cut down a threatening tree.	0.669811	0.183962	0.0707547	0.0377358	0.0377358		0.853774
It is better to replace an old tree with a younger one.	1.67925	It is better to replace an old tree with a younger one.	0.584906	0.240566	0.108491	0.0424528	0.0235849	0.02		It is better to replace an old tree with a younger one.	0.584906	0.240566	0.108491	0.0424528	0.0235849		0.825472
Dying trees should be cut down even if they are natural monuments.	1.74057	Dying trees should be cut down even if they are natural monuments.	0.54717	0.268868	0.113208	0.0377358	0.0330189	0.03		Dying trees should be cut down even if they are natural monuments.	0.54717	0.268868	0.113208	0.0377358	0.0330189		0.816038
The only way to ensure the safety of walkers is to cut down a threatening tree.	1.58962	The only way to ensure the safety of walkers is to cut down a threatening tree.	0.669811	0.183962	0.0707547	0.0377358	0.0377358	0.04		ld trees in themunicipal forest pose a potential threat to the safety of visitors.	0.490566	0.278302	0.136792	0.0754717	0.0188679		0.768868
Trees with hollows pose a greater threat than trees without hollows.	2.07075	Trees with hollows pose a greater threat than trees without hollows.	0.443396	0.221698	0.212264	0.0660377	0.0566038	0.05		Trees in municipal forests should undergo the same care as street trees.	0.495283	0.207547	0.113208	0.0801887	0.103774		0.70283
Cutting branches improves the health of even old trees.	2.7783	Cutting branches improves the health of even old trees.	0.160377	0.193396	0.438679	0.122642	0.0849057	0.06		Trees with hollows pose a greater threat than trees without hollows.	0.443396	0.221698	0.212264	0.0660377	0.0566038		0.665094
Decayed trees inside must be cut down immediately.	2.40566	Decayed trees inside must be cut down immediately.	0.334906	0.226415	0.231132	0.113208	0.0943396	0.07		Decayed trees inside must be cut down immediately.	0.334906	0.226415	0.231132	0.113208	0.0943396		0.561321
Trees in municipal forests should undergo the same care as street trees.	2.08962	Trees in municipal forests should undergo the same care as street trees.	0.495283	0.207547	0.113208	0.0801887	0.103774	0.08		Old trees increase the attractiveness of municipal forests.	0.00943396	0.00471698	0.0188679	0.141509	0.825472	0.966981
Old trees are more valuable to the environment than younger trees.	3.95283	Old trees are more valuable to the environment than younger trees.	0.0188679	0.0613208	0.264151	0.259434	0.396226	0.09		Fruiting bodies of fungi on the trunk or branches do not mean a death sentence for the tree on which they grow.	0.0849057	0.0566038	0.165094	0.231132	0.462264	0.693396
There are many methods to determine the actual health of very old trees.	4.1934	There are many methods to determine the actual health of very old trees.		0.0235849	0.207547	0.320755	0.448113	0.1		There are many methods to determine the actual health of very old trees.		0.0235849	0.207547	0.320755	0.448113	0.768868
Fruiting bodies of fungi on the trunk or branches do not mean a death sentence for the tree on which they grow.	3.92925	Fruiting bodies of fungi on the trunk or branches do not mean a death sentence for the tree on which they grow.	0.0849057	0.0566038	0.165094	0.231132	0.462264	0.11		Old trees are more valuable to the environment than younger trees.	0.0188679	0.0613208	0.264151	0.259434	0.396226	0.65566
Old trees increase the attractiveness of municipal forests.	4.76887	Old trees increase the attractiveness of municipal forests.	0.00943396	0.00471698	0.0188679	0.141509	0.825472	0.12		Cutting branches improves the health of even old trees.	0.160377	0.193396	0.438679	0.122642	0.0849057	0.207547
															Decayed trees inside must be cut down immediately.
															Trees with hollows pose a greater threat than trees without hollows.
															The only way to ensure the safety of walkers is to cut down a threatening tree.
															Dying trees should be cut down even if they are natural monuments.
															It is better to replace an old tree with a younger one.
															Old trees in themunicipal forest pose a potential threat to the safety of visitors.
	p1_r
	contact once a month or more	contact less than once a month
Trees with hollows pose a greater threat than trees without hollows.	1.86	2.37
	$p2
	Barciucha Anin	Chojnowski Park Krajobrazowy	Kampinoski Park Narodowy	Las Bemowski	Las Bielański	Las Bródno	Las Kabacki	Las Lindego	Las Młochowski	Las Młociński	Las na Kole	Las Sobieskiego	Las w Choszczówce	Las w Starej Miłosnej	Las Winnica	Lasy podmiejskie koło Otwocka i Celestynowa	Lasy Sękocińskie	Lasy w Międzylesiu	lasy wawerskie	Łazienki Królewskie	Olszynka Grochowska	Park Olszyna	Rezerwat Skarpa Ursynowska	Stare cmentarze warszawskie	Szczęśliwice	Wiśniowa Góra	Zalesione części Białołęki
	(AA)	(AB)	(AC)	(AD)	(AE)	(AF)	(AG)	(AH)	(AI)	(AJ)	(AK)	(AL)	(AM)	(AN)	(AO)	(AP)	(AQ)	(AR)	(AS)	(AT)	(AU)	(AV)	(AW)	(AX)	(AY)	(AZ)	(BA)
	Average	Average	Average	Average	Average	Average	Average	Average	Average	Average	Average	Average	Average	Average	Average	Average	Average	Average	Average	Average	Average	Average	Average	Average	Average	Average	Average
Old trees in themunicipal forest pose a potential threat to the safety of visitors.	2.001	1.001	1.33	1.80	1.81	1.67	1.94	1.86	1.001	1.65	1.64	2.29	1.001	1.001	3.001	4.001	1.001	2.00	4.001	1.001	1.90	1.39	1.001	3.001	2.001	1.001	2.001
Old trees are more valuable to the environment than younger trees.	2.001	5.001	3.67	3.96	3.98	3.83	3.98	3.86	5.001	3.88	4.24	3.14	5.001	5.001	4.001	3.001	5.001	4.50	4.001	5.001	3.60	3.56	5.001	4.001	5.001	5.001	5.001
It is better to replace the old tree with a younger one.	3.001	1.001	1.83	1.66	1.62	2.06	1.59	2.14	1.001	1.71	1.72	2.57	1.001	1.001	2.001	4.001	1.001	1.50	1.001	2.001	2.60	1.72	1.001	1.001	1.001	1.001	2.001
Fruiting bodies of fungi on the trunk or branches do not mean a death sentence for the tree on which they grow.	3.001	3.001	3.67	3.78	3.86	4.06	3.98	4.57	3.001	3.92	3.76	3.14	5.001	4.001	4.001	4.001	3.001	5.00	5.001	4.001	3.80	3.78	5.001	4.001	5.001	5.001	5.001
Trees with hollows pose a greater threat than trees without hollows.	4.001	3.001	1.67	1.96	1.91	1.83	2.26	2.00	3.001	1.91	1.92	2.57	1.001	1.001	3.001	3.001	3.001	1.00	3.001	1.001	1.90	1.94	1.001	2.001	5.001	1.001	1.001
Decayed trees inside must be cut down immediately.	4.001	2.001	2.67	2.50	2.37	2.89	2.27	2.71	2.001	2.47	2.28	2.71	2.001	1.001	3.001	5.001	2.001	3.50	5.001	3.001	2.60	2.72	1.001	2.001	4.001	3.001	3.001
Old trees increase the attractiveness of municipal forests.	4.001	5.001	4.67	4.76	4.72	4.61	4.81	4.71	5.001	4.62	4.72	4.71	5.001	5.001	5.001	4.001	5.001	5.00	5.001	5.001	4.70	4.56	5.001	5.001	5.001	5.001	5.001
Dying trees should be cut down even if they are natural monuments.	3.001	1.001	1.33	1.54	1.70	1.56	1.73	1.57	1.001	1.73	1.48	2.14	1.001	1.001	4.001	2.001	1.001	2.00	1.001	1.001	2.00	1.61	1.001	2.001	5.001	2.001	1.001
Trees in municipal forests should undergo the same care as street trees.	2.001	1.001	1.83	2.08	2.09	2.33	2.02	2.14	1.001	1.95	1.88	1.57	1.001	1.001	2.001	2.001	1.001	5.00 (AL) (AV)	1.001	5.001	2.00	1.56	1.001	4.001	1.001	5.001	1.001
Cutting branches improves the health of even old trees.	4.001	1.001	2.67	3.04	2.79	2.61	2.64	2.43	1.001	2.58	2.88	2.29	1.001	2.001	3.001	4.001	1.001	4.50	1.001	5.001	2.80	2.33	2.001	4.001	3.001	4.001	3.001
There are many methods to determine the actual health of very old trees.	4.001	5.001	4.50	4.06	4.21	4.28	4.10	4.14	5.001	4.21	4.16	3.86	4.001	5.001	4.001	4.001	5.001	4.50	3.001	4.001	4.50	4.17	5.001	4.001	5.001	4.001	3.001
The only way to ensure the safety of walkers is to cut down a threatening tree.	2.001	1.001	1.00	1.40	1.51	1.67	1.63	1.29	1.001	1.59	1.36	2.71	1.001	1.001	2.001	2.001	1.001	1.50	1.001	1.001	1.60	1.67	1.001	2.001	1.001	1.001	1.001
The results are based on two-tailed tests, assuming equality of variance. For each significant pair, the smaller category key appears in the category with the larger mean. Significance level for capital letters (A, B, C): .052 "
1. This category was not used in the comparisons because the sum of the weights of the cases is less than two.
2. Tests are adjusted for all pairwise comparisons within each inner subtable using the Bonferroni correction.
	$p3
	Close distance	Silence	Bike paths	Contact with nature	Playgrounds	Beautiful landscapes	Possibility to walk the dog	Possibility to play sports	Picnis sites	Peace and space	Comfortable hiking trails
	(A)	(B)	(C)	(D)	(E)	(F)	(G)	(H)	(I)	(J)	(K)
	Average	Average	Average	Average	Average	Average	Average	Average	Average	Average	Average
Old trees in the municipal forest pose a potential threat to the safety of visitors.	1.00	2.67	2.00	1.82	2.11	1.77	4.001	1.74	1.93	1.001	1.84
Old trees are more valuable to the environment than younger trees.	3.00	4.33	4.50	3.99	3.86	4.10	3.001	4.00	3.72	5.001	3.91
It is better to replace the old tree with a younger one.	1.50	1.00	1.50	1.66	1.96	1.56	2.001	1.57	1.76	2.001	1.73
Fruiting bodies of fungi on the trunk or branches do not mean a death sentence for the tree on which they grow.	4.00	4.67	3.00	3.96	3.82	3.98	4.001	3.98	3.72	5.001	3.98
Trees with hollows pose a greater threat than trees without hollows.	2.50	2.33	1.50	2.09	2.25	2.13	1.001	1.97	2.07	1.001	2.09
Decayed trees inside must be cut down immediately.	2.00	2.33	2.00	2.36	2.32	2.35	5.001	2.53	2.65	4.001	2.56
Old trees increase the attractiveness of municipal forests.	5.00	5.00	4.50	4.78	4.75	4.81	4.001	4.88	4.74	5.001	4.70
Dying trees should be cut down even if they are natural monuments.	1.00	1.00	1.50	1.72	1.89	1.74	2.001	1.88	1.74	1.001	1.81
Trees in municipal forests should undergo the same care as street trees.	1.50	1.67	3.00	2.04	2.93 D F H I	2.08	4.001	1.88	1.93	1.001	2.27
Cutting branches improves the health of even old trees.	2.50	2.00	3.00	2.75	3.39	2.71	3.001	2.74	2.80	2.001	2.87
There are many methods to determine the actual health of very old trees.	3.00	3.67	3.50	4.20	4.11	4.19	4.001	4.29	4.11	5.001	4.25
The only way to ensure the safety of walkers is to cut down a threatening tree.	1.00	1.00	1.00	1.56	1.68	1.61	1.001	1.64	1.74	1.001	1.64
The results are based on two-tailed tests, assuming equality of variance. For each significant pair, the minor category key appears in the larger mean category. Significance level for capital letters (A, B, C): .052.3
1. This category was not used in the comparisons because the sum of the weights of the cases is less than two.
2. Tests are adjusted for all pairwise comparisons within each inner subtable using the Bonferroni correction.
3. Pairwise comparisons are not presented for some pairs because the estimate of the variance common to the compared categories is zero.
	$p3
	Close distance	Silence	Bike paths	Contact with nature	Playgrounds	Beautiful landscapes	Possibility to walk the dog	Possibility to play sports	Picnis sites	Peace and space	Comfortable hiking trails
Old trees in the municipal forest pose a potential threat to the safety of visitors. pielęgnacyjnym, jak drzewa przy ulicach.	1.5	1.66667	3	2.04124	2.92857	2.08088	4	1.87931	1.93478	1	2.26984
	Wiek
							18-25	46-55	p < 0,01
	18-25	26-35	36-45	46-55	>56		18-25	>56	p < 0,05
Old trees in the municipal forest pose a potential threat to the safety of visitors.	2.26829	1.87671	1.83333	1.43478	1.33333
Trees with hollows pose a greater threat than trees without hollows.	2.73171	1.80822	2.03333	1.95652	1.86667		18-25	26-35	p < 0,01
The only way to ensure the safety of walkers is to cut down a threatening tree.	2.09756	1.43836	1.41667	1.78261	1.33333		18-25	36-45	p < 0,05
	Education
	Elementary	Vocational	Secondary	Students	Higher
Trees with hollows pose a greater threat than trees without hollows.	1	1	1.97	2.7	2.01

## Sheet: Arkusz3
		5417.5	5254.5	5726.5	5598.5	6531.5	5244.5	5332.5	5743	5558	5364.5	5117	5436
		p = n.i.	p = n.i.	p = n.i.	p = n.i.	p< 0,01	p = n.i.	p = n.i.	p = n.i.	p = n.i.	p = n.i.	p = n.i.	p = n.i.
									Test U Manna-Whitneya	Istotność asymptotyczna
								Drzewa z dziuplami stanowią większe zagrożenie niż drzewa bez dziupli.	6531.5	p< 0,01
								Stare drzewa w lesie miejskim stanowią potencjalne zagrożenie dla bezpieczeństwa odwiedzających:	5417.5	p = n.i.
								Stare drzewa są bardziej wartościowe dla środowiska, niż drzewa młodsze.	5254.5	p = n.i.
								Stare drzewo lepiej zastąpić młodszym.	5726.5	p = n.i.
								Grzyby na pniu lub gałęziach nie oznaczają wyroku śmierci dla drzewa, na którym rosną.	5598.5	p = n.i.
								Drzewa spróchniałe w środku trzeba natychmiast wyciąć.	5244.5	p = n.i.
								Stare drzewa podnoszą atrakcyjność rezerwatów miejskich.	5332.5	p = n.i.
								Drzewa obumierające należy wycinać nawet, jeśli są pomnikami przyrody.	5743	p = n.i.
								Drzewa w rezerwatach powinno poddawać się takim samym zabiegom pielęgnacyjnym, jak drzewa przy ulicach.	5558	p = n.i.
								Cięcie gałęzi poprawia stan zdrowia nawet starych drzew.	5364.5	p = n.i.
								Jest wiele metod pozwalających określić faktyczny stan zdrowia bardzo starych drzew.	5117	p = n.i.
								Jedyną metodą zapewnienia bezpieczeństwa spacerowiczów jest wycięcie zagrażającego drzewa.	5436	p = n.i.
