# Supplementary material for: Old trees are perceived as a valuable element of the municipal forest landscape
Source: PeerJ. 2022 Jan 12;10:e12700. doi: 10.7717/peerj.12700 (PMC8760855; doi:10.7717/peerj.12700)
Supplement: Supplemental Information 5 [file peerj-10-12700-s005.xlsx]

## Sheet: Arkusz2
		Old trees are more valuable element of the environment than young trees”.			"Trees in municipal forests should receive the same care as street trees”.
Pairwise comparisons		U Manna-Whitney test	statistical significance		U Manna-Whitney test	statistical significance
Everyday	Several times a week	54	0.0506416		86	0.626808
Everyday	Once a week	102	0.0241345		205	0.965234
Everyday	Once per several weeks	78	0.00896469		180	0.65747
Everyday	Once a month	129	0.0296512		214	0.552484
Everyday	Several times per year	291	0.0250314		547	0.839756
Several times a week	Once a weeks	1044.5	0.635752		984.5	0.321317
Several times a week	Once per several weeks	850.5	0.0789054		792	0.0244271
Several times a week	Once a month	1266	0.67131		895	0.00436824
Several times a week	Several times per year	2887	0.585707		2475.5	0.0635824
Once a week	Once per several weeks	1924	0.07329		1940	0.0831065
Once a week	Once a month	2850	0.95669		2199.5	0.00942584
Once a week	Several times per year	6559.5	0.951517		6020.5	0.252348
Once per several weeks	Once a month	2316	0.0609527		2553.5	0.372482
Once per several weeks	Several times per year	5381.5	0.0378591		5925	0.339008
Once a month	Several times per year	7853	0.894465		6719.5	0.0347466
test post-hoc for Kruskalla Walis test
Testy chi-2Pearsona
		Gender	Age	Hiw often do you viist municipal forests?
The only way to ensure the safety of walkers is to cut down a threatening tree	Chi-kwadrat	0.0870706	18.1669	20.3801
	df	2	8	10
	significance	0.957399	.020*,b	.026*,b,c
The results are based on non-empty rows and columns in each of the innermost subtables.
*. The chi-square statistic is significant at the .05 level.
b. More than 20% of cells in this subtable have expected cell counts less than 5. The chi-square test results may be incorrect.
c. The minimum expected cell count for this subtable is less than one. The chi-square test results may be incorrect.
		Gender		Age					How often do you visit municipal forests in Warsaw?
		Female	Male	18-25	26-35	36-45	46-55	>56	Everyday	Several times per week	Once a week	Once per several weeks	Once a month	Several times per year
		(A)	(B)	(A)	(B)	(C)	(D)	(E)	(A)	(B)	(C)	(D)	(E)	(F)
Chi2 test		χ2 = 0.09; p = n.i.		χ2 = 18.17; p < 0,05					χ2 = 20.38; p < 0,05
The only way to ensure the safety of walkers is to cut down a threatening tree	Yes	45.8%	47.2%	55.9% D	52.1% D	44.3%	28.6%	40.5%	0	25.0%	55.1% B	47.8%	44.6%	48.2%
	No	50.8%	49.6%	40.2%	44.5%	51.3%	68.6% A B	59.5%	1	75.0% C F	40.6%	52.2%	50.6%	47.6%
	I don’t know	3.4%	3.1%	3.9%	3.4%	4.3%	2.9%	0.0%1	0	0.0%1	4.3%	0.0%1	4.8%	4.2%
"The results are based on two-tailed tests. For each significant pair, the category with the smaller column proportion appears under the category with the larger column proportion. Significance level for capital letters (A, B, C): .052 "
1. This category was not used in the comparisons because its column proportion is zero or one.
2. Tests are adjusted for all pairwise comparisons within each inner subtable using the Bonferroni correction.
